# Supplementary material
Source: publisher figshare collection journal article supplement (https://acs.figshare.com/ndownloader/files/5689512)
Supplement: Supplementary file 1 [file 5689512]

# ic001209g.cif

data_srti97

_audit_creation_method            SHELXL-97
_chemical_name_systematic
;
 ?
;
_chemical_name_common             ?
_chemical_formula_moiety          ?
_chemical_formula_sum
 'Mo5.30 O10 Sr Ti0.70'
_chemical_formula_weight          789.63

loop_
 _atom_type_symbol
 _atom_type_description
 _atom_type_scat_dispersion_real
 _atom_type_scat_dispersion_imag
 _atom_type_scat_source
 'Sr'  'Sr'  -1.5307   3.2498
 'International Tables Vol C Tables 4.2.6.8 and 6.1.1.4'
 'Ti'  'Ti'   0.2776   0.4457
 'International Tables Vol C Tables 4.2.6.8 and 6.1.1.4'
 'Mo'  'Mo'  -1.6832   0.6857
 'International Tables Vol C Tables 4.2.6.8 and 6.1.1.4'
 'O'  'O'   0.0106   0.0060
 'International Tables Vol C Tables 4.2.6.8 and 6.1.1.4'

_symmetry_cell_setting            orthorhombic
_symmetry_space_group_name_H-M    Pbca

loop_
 _symmetry_equiv_pos_as_xyz
 'x, y, z'
 '-x+1/2, y+1/2, z'
 'x, -y+1/2, z+1/2'
 '-x+1/2, -y, z+1/2'
 '-x, -y, -z'
 'x-1/2, -y-1/2, -z'
 '-x, y-1/2, -z-1/2'
 'x-1/2, y, -z-1/2'

_cell_length_a                    9.1085(7)
_cell_length_b                    11.4180(10)
_cell_length_c                    15.092(3)
_cell_angle_alpha                 90.00
_cell_angle_beta                  90.00
_cell_angle_gamma                 90.00
_cell_volume                      1569.6(4)
_cell_formula_units_Z             8
_cell_measurement_temperature     293(2)
_cell_measurement_reflns_used     25
_cell_measurement_theta_min       11.45
_cell_measurement_theta_max       29.37

_exptl_crystal_description        'irregular fragment'
_exptl_crystal_colour             black
_exptl_crystal_size_max           0.14
_exptl_crystal_size_mid           0.14
_exptl_crystal_size_min           0.04
_exptl_crystal_density_meas       ?
_exptl_crystal_density_diffrn     6.683
_exptl_crystal_density_method     'not measured'
_exptl_crystal_F_000              2848
_exptl_absorpt_coefficient_mu     15.661
_exptl_absorpt_correction_type    psi-scan
_exptl_absorpt_process_details    '(North, Phillips & Mathews, 1968)'
_exptl_absorpt_correction_T_min   0.254
_exptl_absorpt_correction_T_max   0.534

_exptl_special_details
;
 ?
;


_diffrn_ambient_temperature       293(2)
_diffrn_radiation_wavelength      0.71073
_diffrn_radiation_type            MoK\a
_diffrn_radiation_source          'fine-focus sealed tube'
_diffrn_radiation_monochromator   graphite
_diffrn_measurement_device        'Enraf-Nonius CAD-4'
_diffrn_measurement_method        \q-2\q
_diffrn_detector_area_resol_mean  ?
_diffrn_standards_number          3
_diffrn_standards_interval_count  ?
_diffrn_standards_interval_time   3600
_diffrn_standards_decay_%        <1%
_diffrn_reflns_number             6453
_diffrn_reflns_av_R_equivalents   0.0000
_diffrn_reflns_av_sigmaI/netI     0.0670
_diffrn_reflns_limit_h_min        0
_diffrn_reflns_limit_h_max        18
_diffrn_reflns_limit_k_min        -22
_diffrn_reflns_limit_k_max        0
_diffrn_reflns_limit_l_min        0
_diffrn_reflns_limit_l_max        29
_diffrn_reflns_theta_min          2.70
_diffrn_reflns_theta_max          44.95
_reflns_number_total              6453
_reflns_number_gt                 3493
_reflns_threshold_expression      >2sigma(I)

_computing_data_collection        'CAD 4 Software (Enraf-Nonius, 1989)'
_computing_cell_refinement        'CAD 4 Software (Enraf-Nonius, 1989)'
_computing_data_reduction         'MolEN (Fair, 1990)'
_computing_structure_solution     'SHELXS (Sheldrick, 1990)'
_computing_structure_refinement   'SHELXL-97 (Sheldrick, 1997)'
_computing_molecular_graphics     'ORTEPII (Johnson, 1976)'
_computing_publication_material    'SHELXL-97 (Sheldrick, 1997)'

_refine_special_details
;
 Refinement of F^2^ against ALL reflections.  The weighted R-factor wR and
 goodness of fit S are based on F^2^, conventional R-factors R are based
 on F, with F set to zero for negative F^2^. The threshold expression of
 F^2^ > 2sigma(F^2^) is used only for calculating R-factors(gt) etc. and is
 not relevant to the choice of reflections for refinement.  R-factors based
 on F^2^ are statistically about twice as large as those based on F, and R-
 factors based on ALL data will be even larger.
;

_refine_ls_structure_factor_coef  Fsqd
_refine_ls_matrix_type            full
_refine_ls_weighting_scheme
 'calc w=1/[\s^2^(Fo^2^)+(0.0297P)^2^+0.0000P] where P=(Fo^2^+2Fc^2^)/3'
_atom_sites_solution_primary      direct
_atom_sites_solution_secondary    difmap
_atom_sites_solution_hydrogens    geom
_refine_ls_hydrogen_treatment     mixed
_refine_ls_extinction_method      SHELXL
_refine_ls_extinction_coef        0.00120(4)
_refine_ls_extinction_expression
 'Fc^*^=kFc[1+0.001xFc^2^\l^3^/sin(2\q)]^-1/4^'
_refine_ls_number_reflns          6453
_refine_ls_number_parameters      166
_refine_ls_number_restraints      1
_refine_ls_R_factor_all           0.0919
_refine_ls_R_factor_gt            0.0357
_refine_ls_wR_factor_ref          0.0771
_refine_ls_wR_factor_gt           0.0682
_refine_ls_goodness_of_fit_ref    1.025
_refine_ls_restrained_S_all       1.025
_refine_ls_shift/su_max           0.001
_refine_ls_shift/su_mean          0.000

loop_
 _atom_site_label
 _atom_site_type_symbol
 _atom_site_fract_x
 _atom_site_fract_y
 _atom_site_fract_z
 _atom_site_U_iso_or_equiv
 _atom_site_adp_type
 _atom_site_occupancy
 _atom_site_calc_flag
 _atom_site_refinement_flags
 _atom_site_disorder_assembly
 _atom_site_disorder_group
Mo1 Mo 0.62235(3) 0.17780(3) 0.13465(2) 0.00531(5) Uani 1 d . . .
Mo2 Mo 0.38613(3) 0.05384(3) 0.18738(2) 0.00559(5) Uani 1 d . . .
Mo3 Mo 0.37347(3) 0.17186(3) 0.02651(2) 0.00393(5) Uani 1 d . . .
Mo4 Mo 0.63259(3) 0.93730(3) 0.12598(2) 0.00398(5) Uani 1 d . . .
Mo5 Mo 0.12555(3) 0.43492(3) 0.02739(2) 0.00340(5) Uani 1 d . . .
Sr1 Sr 0.49231(4) 0.58819(4) 0.10031(3) 0.00903(7) Uani 1 d . . .
Ti1 Ti 0.3618(2) 0.18101(17) 0.70365(13) 0.0043(2) Uani 0.701(4) d P . .
Mo6 Mo 0.3844(2) 0.29487(18) 0.19601(15) 0.0040(3) Uani 0.299(4) d P . .
O1 O 0.2633(3) 0.4394(2) 0.81056(18) 0.0053(4) Uani 1 d . . .
O2 O 0.9907(3) 0.1945(3) 0.9122(2) 0.0095(5) Uani 1 d . . .
O3 O 0.2560(3) 0.3089(2) 0.96976(19) 0.0065(4) Uani 1 d . . .
O4 O 0.0026(4) 0.3193(2) 0.7539(2) 0.0132(6) Uani 1 d . . .
O5 O 0.2543(3) 0.1934(2) 0.80667(18) 0.0059(4) Uani 1 d . . .
O6 O 0.9880(3) 0.0671(2) 0.7456(2) 0.0059(5) Uani 1 d . . .
O7 O 0.2537(3) 0.1829(2) 0.14161(19) 0.0069(5) Uani 1 d . . .
O8 O 0.2570(3) 0.4357(2) 0.14006(19) 0.0064(5) Uani 1 d . . .
O9 O 0.5031(3) 0.1938(2) 0.91801(18) 0.0048(4) Uani 1 d . . .
O10 O 0.2190(3) 0.0519(3) 0.97933(18) 0.0052(4) Uani 1 d . . .

loop_
 _atom_site_aniso_label
 _atom_site_aniso_U_11
 _atom_site_aniso_U_22
 _atom_site_aniso_U_33
 _atom_site_aniso_U_23
 _atom_site_aniso_U_13
 _atom_site_aniso_U_12
Mo1 0.00476(11) 0.00744(13) 0.00373(11) 0.00158(9) -0.00110(10) -0.00240(10)
Mo2 0.00355(10) 0.01028(13) 0.00293(11) 0.00205(10) 0.00022(9) -0.00021(11)
Mo3 0.00351(11) 0.00417(11) 0.00411(11) 0.00050(9) 0.00007(9) 0.00028(10)
Mo4 0.00343(11) 0.00569(12) 0.00284(11) -0.00006(9) -0.00034(9) 0.00026(9)
Mo5 0.00336(11) 0.00408(12) 0.00276(10) 0.00029(9) -0.00006(9) -0.00009(9)
Sr1 0.00775(14) 0.01077(15) 0.00856(14) -0.00062(14) -0.00091(12) 0.00067(13)
Ti1 0.0053(5) 0.0046(6) 0.0030(4) 0.0006(4) 0.0004(4) -0.0010(4)
Mo6 0.0047(6) 0.0028(7) 0.0044(6) -0.0005(5) 0.0007(4) 0.0010(4)
O1 0.0065(10) 0.0065(11) 0.0028(10) -0.0006(9) 0.0023(8) -0.0001(8)
O2 0.0058(11) 0.0105(12) 0.0122(14) -0.0054(10) -0.0002(10) 0.0000(9)
O3 0.0072(10) 0.0077(11) 0.0046(9) 0.0001(10) -0.0010(9) 0.0041(9)
O4 0.0114(12) 0.0102(14) 0.0181(15) -0.0052(12) -0.0120(11) 0.0012(12)
O5 0.0064(10) 0.0071(10) 0.0041(10) 0.0010(9) 0.0006(9) 0.0032(8)
O6 0.0062(10) 0.0066(11) 0.0049(10) -0.0020(9) 0.0012(8) 0.0010(9)
O7 0.0075(10) 0.0060(12) 0.0073(11) -0.0023(9) 0.0019(10) -0.0005(9)
O8 0.0063(10) 0.0075(12) 0.0053(11) -0.0023(9) -0.0011(9) 0.0009(9)
O9 0.0053(9) 0.0042(10) 0.0047(10) 0.0008(8) 0.0006(8) 0.0002(8)
O10 0.0055(10) 0.0061(10) 0.0041(10) -0.0006(9) -0.0005(8) 0.0001(9)

_geom_special_details
;
 All esds (except the esd in the dihedral angle between two l.s. planes)
 are estimated using the full covariance matrix.  The cell esds are taken
 into account individually in the estimation of esds in distances, angles
 and torsion angles; correlations between esds in cell parameters are only
 used when they are defined by crystal symmetry.  An approximate (isotropic)
 treatment of cell esds is used for estimating esds involving l.s. planes.
;

loop_
 _geom_bond_atom_site_label_1
 _geom_bond_atom_site_label_2
 _geom_bond_distance
 _geom_bond_site_symmetry_2
 _geom_bond_publ_flag
Mo1 O3 1.997(3) 6_666 ?
Mo1 O4 2.005(3) 6_666 ?
Mo1 O2 2.016(3) 6_566 ?
Mo1 O1 2.030(3) 6_666 ?
Mo1 O5 2.095(3) 6_666 ?
Mo1 Mo2 2.6956(5) . ?
Mo1 Mo6 2.710(2) . ?
Mo1 Mo4 2.7507(5) 1_545 ?
Mo1 Mo5 2.7636(6) 6_665 ?
Mo1 Mo3 2.7941(5) . ?
Mo1 Ti1 3.052(2) 3_554 ?
Mo1 Sr1 3.6925(6) 2_645 ?
Mo2 O6 1.998(3) 4_654 ?
Mo2 O4 2.002(3) 6_666 ?
Mo2 O8 2.008(3) 2_545 ?
Mo2 O7 2.026(3) . ?
Mo2 O1 2.171(3) 3_554 ?
Mo2 Mo6 2.755(2) . ?
Mo2 Mo4 2.7692(5) 1_545 ?
Mo2 Mo5 2.7722(6) 2_545 ?
Mo2 Mo3 2.7792(6) . ?
Mo2 Ti1 3.046(2) 3_554 ?
Mo2 Sr1 3.4126(8) 7_656 ?
Mo3 O9 2.034(3) 1_554 ?
Mo3 O7 2.055(3) . ?
Mo3 O2 2.079(3) 6_566 ?
Mo3 O3 2.080(3) 1_554 ?
Mo3 O10 2.089(3) 1_554 ?
Mo3 Mo4 2.6178(6) 5_665 ?
Mo3 Mo5 2.7054(5) 2_545 ?
Mo3 Mo5 2.7240(4) 6_665 ?
Mo3 Mo6 2.920(2) . ?
Mo3 Ti1 3.159(2) 3_554 ?
Mo4 O9 2.052(3) 5_666 ?
Mo4 O1 2.077(3) 6_676 ?
Mo4 O5 2.079(3) 5_666 ?
Mo4 O10 2.090(3) 5_666 ?
Mo4 O6 2.114(3) 4_664 ?
Mo4 Mo3 2.6178(6) 5_665 ?
Mo4 Mo5 2.7368(6) 6_675 ?
Mo4 Mo1 2.7507(5) 1_565 ?
Mo4 Mo2 2.7692(5) 1_565 ?
Mo4 Mo5 2.7827(5) 2 ?
Mo4 Ti1 2.905(2) 5_666 ?
Mo4 Mo6 3.144(2) 7_666 ?
Mo5 O9 2.021(3) 6_566 ?
Mo5 O3 2.059(3) 1_554 ?
Mo5 O10 2.077(3) 2_554 ?
Mo5 O8 2.080(3) . ?
Mo5 Mo3 2.7054(5) 2 ?
Mo5 Mo3 2.7240(4) 6_565 ?
Mo5 Mo4 2.7368(6) 6_575 ?
Mo5 Mo1 2.7636(6) 6_565 ?
Mo5 Mo2 2.7722(6) 2 ?
Mo5 Mo4 2.7827(5) 2_545 ?
Mo5 Mo5 2.8501(6) 5_565 ?
Mo5 Sr1 3.9285(6) . ?
Sr1 O9 2.504(3) 5_666 ?
Sr1 O4 2.548(4) 4_564 ?
Sr1 O7 2.565(3) 2 ?
Sr1 O1 2.620(3) 5_666 ?
Sr1 O10 2.685(3) 2_554 ?
Sr1 O3 2.784(3) 5_666 ?
Sr1 O8 2.826(3) . ?
Sr1 O10 2.875(3) 6_666 ?
Sr1 O6 2.925(3) 6_566 ?
Sr1 O2 3.091(3) 2_654 ?
Sr1 O2 3.233(3) 6_566 ?
Sr1 Mo2 3.4126(8) 7_666 ?
Ti1 Mo6 0.3629(15) 3 ?
Ti1 O5 1.843(3) . ?
Ti1 O6 1.898(3) 8_557 ?
Ti1 O8 1.899(3) 3 ?
Ti1 O7 2.064(3) 3 ?
Ti1 O2 2.112(4) 8_557 ?
Ti1 O4 2.133(4) 8_657 ?
Ti1 Mo4 2.905(2) 5_666 ?
Ti1 Mo2 3.046(2) 3 ?
Ti1 Mo1 3.052(2) 3 ?
Ti1 Mo3 3.159(2) 3 ?
Ti1 Sr1 3.646(2) 3 ?
Mo6 Ti1 0.3629(15) 3_554 ?
Mo6 O4 1.852(4) 6_666 ?
Mo6 O2 1.903(4) 6_566 ?
Mo6 O7 1.930(3) . ?
Mo6 O6 2.038(3) 6_566 ?
Mo6 O5 2.052(3) 3_554 ?
Mo6 O8 2.155(3) . ?
Mo6 Mo4 3.144(2) 7_656 ?
O1 Mo1 2.030(3) 6_566 ?
O1 Mo4 2.077(3) 6_576 ?
O1 Mo2 2.171(3) 3 ?
O1 Sr1 2.620(3) 5_666 ?
O2 Mo6 1.903(4) 6_666 ?
O2 Mo1 2.016(3) 6_666 ?
O2 Mo3 2.079(3) 6_666 ?
O2 Ti1 2.112(4) 8_657 ?
O2 Sr1 3.091(3) 2_646 ?
O2 Sr1 3.233(3) 6_666 ?
O3 Mo1 1.997(3) 6_566 ?
O3 Mo5 2.059(3) 1_556 ?
O3 Mo3 2.080(3) 1_556 ?
O3 Sr1 2.784(3) 5_666 ?
O4 Mo6 1.852(4) 6_566 ?
O4 Mo2 2.002(3) 6_566 ?
O4 Mo1 2.005(3) 6_566 ?
O4 Ti1 2.133(4) 8_557 ?
O4 Sr1 2.548(4) 4_565 ?
O5 Mo6 2.052(3) 3 ?
O5 Mo4 2.079(3) 5_666 ?
O5 Mo1 2.095(3) 6_566 ?
O6 Ti1 1.898(3) 8_657 ?
O6 Mo2 1.998(3) 4_655 ?
O6 Mo6 2.038(3) 6_666 ?
O6 Mo4 2.114(3) 4_665 ?
O6 Sr1 2.925(3) 6_666 ?
O7 Ti1 2.064(3) 3_554 ?
O7 Sr1 2.565(3) 2_545 ?
O8 Ti1 1.899(3) 3_554 ?
O8 Mo2 2.008(3) 2 ?
O9 Mo5 2.021(3) 6_666 ?
O9 Mo3 2.034(3) 1_556 ?
O9 Mo4 2.052(3) 5_666 ?
O9 Sr1 2.504(3) 5_666 ?
O10 Mo5 2.077(3) 2_546 ?
O10 Mo3 2.089(3) 1_556 ?
O10 Mo4 2.090(3) 5_666 ?
O10 Sr1 2.685(3) 2_546 ?
O10 Sr1 2.875(3) 6_566 ?

loop_
 _geom_angle_atom_site_label_1
 _geom_angle_atom_site_label_2
 _geom_angle_atom_site_label_3
 _geom_angle
 _geom_angle_site_symmetry_1
 _geom_angle_site_symmetry_3
 _geom_angle_publ_flag
O3 Mo1 O4 172.90(12) 6_666 6_666 ?
O3 Mo1 O2 91.77(12) 6_666 6_566 ?
O4 Mo1 O2 87.63(13) 6_666 6_566 ?
O3 Mo1 O1 89.20(12) 6_666 6_666 ?
O4 Mo1 O1 90.76(13) 6_666 6_666 ?
O2 Mo1 O1 174.66(11) 6_566 6_666 ?
O3 Mo1 O5 86.02(11) 6_666 6_666 ?
O4 Mo1 O5 86.90(12) 6_666 6_666 ?
O2 Mo1 O5 88.97(11) 6_566 6_666 ?
O1 Mo1 O5 85.86(11) 6_666 6_666 ?
O3 Mo1 Mo2 139.42(8) 6_666 . ?
O4 Mo1 Mo2 47.68(9) 6_666 . ?
O2 Mo1 Mo2 90.49(9) 6_566 . ?
O1 Mo1 Mo2 92.19(8) 6_666 . ?
O5 Mo1 Mo2 134.54(8) 6_666 . ?
O3 Mo1 Mo6 136.05(10) 6_666 . ?
O4 Mo1 Mo6 43.11(11) 6_666 . ?
O2 Mo1 Mo6 44.55(10) 6_566 . ?
O1 Mo1 Mo6 133.76(9) 6_666 . ?
O5 Mo1 Mo6 88.18(9) 6_666 . ?
Mo2 Mo1 Mo6 61.29(4) . . ?
O3 Mo1 Mo4 91.01(8) 6_666 1_545 ?
O4 Mo1 Mo4 94.30(8) 6_666 1_545 ?
O2 Mo1 Mo4 136.50(8) 6_566 1_545 ?
O1 Mo1 Mo4 48.69(8) 6_666 1_545 ?
O5 Mo1 Mo4 134.52(8) 6_666 1_545 ?
Mo2 Mo1 Mo4 61.114(12) . 1_545 ?
Mo6 Mo1 Mo4 122.40(5) . 1_545 ?
O3 Mo1 Mo5 47.99(8) 6_666 6_665 ?
O4 Mo1 Mo5 139.09(10) 6_666 6_665 ?
O2 Mo1 Mo5 91.87(9) 6_566 6_665 ?
O1 Mo1 Mo5 92.68(8) 6_666 6_665 ?
O5 Mo1 Mo5 134.01(8) 6_666 6_665 ?
Mo2 Mo1 Mo5 91.441(15) . 6_665 ?
Mo6 Mo1 Mo5 122.73(5) . 6_665 ?
Mo4 Mo1 Mo5 59.511(12) 1_545 6_665 ?
O3 Mo1 Mo3 92.04(9) 6_666 . ?
O4 Mo1 Mo3 92.81(11) 6_666 . ?
O2 Mo1 Mo3 47.93(8) 6_566 . ?
O1 Mo1 Mo3 137.29(8) 6_666 . ?
O5 Mo1 Mo3 136.83(8) 6_666 . ?
Mo2 Mo1 Mo3 60.799(14) . . ?
Mo6 Mo1 Mo3 64.06(5) . . ?
Mo4 Mo1 Mo3 88.596(13) 1_545 . ?
Mo5 Mo1 Mo3 58.695(13) 6_665 . ?
O3 Mo1 Ti1 134.68(9) 6_666 3_554 ?
O4 Mo1 Ti1 44.11(10) 6_666 3_554 ?
O2 Mo1 Ti1 43.55(9) 6_566 3_554 ?
O1 Mo1 Ti1 134.49(9) 6_666 3_554 ?
O5 Mo1 Ti1 86.05(9) 6_666 3_554 ?
Mo2 Mo1 Ti1 63.64(4) . 3_554 ?
Mo6 Mo1 Ti1 2.37(7) . 3_554 ?
Mo4 Mo1 Ti1 124.74(4) 1_545 3_554 ?
Mo5 Mo1 Ti1 123.79(4) 6_665 3_554 ?
Mo3 Mo1 Ti1 65.24(4) . 3_554 ?
O3 Mo1 Sr1 47.99(9) 6_666 2_645 ?
O4 Mo1 Sr1 129.75(11) 6_666 2_645 ?
O2 Mo1 Sr1 135.78(9) 6_566 2_645 ?
O1 Mo1 Sr1 43.41(8) 6_666 2_645 ?
O5 Mo1 Sr1 73.06(8) 6_666 2_645 ?
Mo2 Mo1 Sr1 130.892(15) . 2_645 ?
Mo6 Mo1 Sr1 160.91(5) . 2_645 ?
Mo4 Mo1 Sr1 71.606(12) 1_545 2_645 ?
Mo5 Mo1 Sr1 74.736(12) 6_665 2_645 ?
Mo3 Mo1 Sr1 133.039(16) . 2_645 ?
Ti1 Mo1 Sr1 158.97(4) 3_554 2_645 ?
O6 Mo2 O4 90.08(13) 4_654 6_666 ?
O6 Mo2 O8 93.71(11) 4_654 2_545 ?
O4 Mo2 O8 171.01(12) 6_666 2_545 ?
O6 Mo2 O7 173.85(12) 4_654 . ?
O4 Mo2 O7 86.55(13) 6_666 . ?
O8 Mo2 O7 88.91(11) 2_545 . ?
O6 Mo2 O1 86.79(11) 4_654 3_554 ?
O4 Mo2 O1 82.43(12) 6_666 3_554 ?
O8 Mo2 O1 89.64(11) 2_545 3_554 ?
O7 Mo2 O1 87.66(11) . 3_554 ?
O6 Mo2 Mo1 91.98(8) 4_654 . ?
O4 Mo2 Mo1 47.78(9) 6_666 . ?
O8 Mo2 Mo1 140.02(8) 2_545 . ?
O7 Mo2 Mo1 89.56(8) . . ?
O1 Mo2 Mo1 130.21(7) 3_554 . ?
O6 Mo2 Mo6 132.28(9) 4_654 . ?
O4 Mo2 Mo6 42.22(11) 6_666 . ?
O8 Mo2 Mo6 133.18(9) 2_545 . ?
O7 Mo2 Mo6 44.43(9) . . ?
O1 Mo2 Mo6 85.47(9) 3_554 . ?
Mo1 Mo2 Mo6 59.61(5) . . ?
O6 Mo2 Mo4 49.45(9) 4_654 1_545 ?
O4 Mo2 Mo4 93.81(9) 6_666 1_545 ?
O8 Mo2 Mo4 94.85(8) 2_545 1_545 ?
O7 Mo2 Mo4 135.89(8) . 1_545 ?
O1 Mo2 Mo4 136.18(7) 3_554 1_545 ?
Mo1 Mo2 Mo4 60.425(13) . 1_545 ?
Mo6 Mo2 Mo4 120.03(5) . 1_545 ?
O6 Mo2 Mo5 93.81(9) 4_654 2_545 ?
O4 Mo2 Mo5 139.49(9) 6_666 2_545 ?
O8 Mo2 Mo5 48.40(8) 2_545 2_545 ?
O7 Mo2 Mo5 92.09(8) . 2_545 ?
O1 Mo2 Mo5 138.02(7) 3_554 2_545 ?
Mo1 Mo2 Mo5 91.757(15) . 2_545 ?
Mo6 Mo2 Mo5 122.02(5) . 2_545 ?
Mo4 Mo2 Mo5 60.286(12) 1_545 2_545 ?
O6 Mo2 Mo3 137.98(9) 4_654 . ?
O4 Mo2 Mo3 93.32(10) 6_666 . ?
O8 Mo2 Mo3 89.32(8) 2_545 . ?
O7 Mo2 Mo3 47.52(8) . . ?
O1 Mo2 Mo3 135.18(7) 3_554 . ?
Mo1 Mo2 Mo3 61.352(12) . . ?
Mo6 Mo2 Mo3 63.69(5) . . ?
Mo4 Mo2 Mo3 88.526(15) 1_545 . ?
Mo5 Mo2 Mo3 58.331(15) 2_545 . ?
O6 Mo2 Ti1 133.89(9) 4_654 3_554 ?
O4 Mo2 Ti1 44.25(10) 6_666 3_554 ?
O8 Mo2 Ti1 130.49(9) 2_545 3_554 ?
O7 Mo2 Ti1 42.34(9) . 3_554 ?
O1 Mo2 Ti1 81.84(8) 3_554 3_554 ?
Mo1 Mo2 Ti1 63.90(4) . 3_554 ?
Mo6 Mo2 Ti1 4.31(6) . 3_554 ?
Mo4 Mo2 Ti1 124.31(4) 1_545 3_554 ?
Mo5 Mo2 Ti1 123.66(4) 2_545 3_554 ?
Mo3 Mo2 Ti1 65.51(4) . 3_554 ?
O6 Mo2 Sr1 58.70(8) 4_654 7_656 ?
O4 Mo2 Sr1 47.89(10) 6_666 7_656 ?
O8 Mo2 Sr1 128.46(8) 2_545 7_656 ?
O7 Mo2 Sr1 115.45(8) . 7_656 ?
O1 Mo2 Sr1 50.15(7) 3_554 7_656 ?
Mo1 Mo2 Sr1 87.587(15) . 7_656 ?
Mo6 Mo2 Sr1 80.95(5) . 7_656 ?
Mo4 Mo2 Sr1 96.108(15) 1_545 7_656 ?
Mo5 Mo2 Sr1 152.440(16) 2_545 7_656 ?
Mo3 Mo2 Sr1 141.073(17) . 7_656 ?
Ti1 Mo2 Sr1 80.43(4) 3_554 7_656 ?
O9 Mo3 O7 168.77(11) 1_554 . ?
O9 Mo3 O2 88.25(11) 1_554 6_566 ?
O7 Mo3 O2 81.46(11) . 6_566 ?
O9 Mo3 O3 82.77(11) 1_554 1_554 ?
O7 Mo3 O3 91.65(11) . 1_554 ?
O2 Mo3 O3 83.98(12) 6_566 1_554 ?
O9 Mo3 O10 101.39(11) 1_554 1_554 ?
O7 Mo3 O10 88.34(11) . 1_554 ?
O2 Mo3 O10 168.17(11) 6_566 1_554 ?
O3 Mo3 O10 90.38(11) 1_554 1_554 ?
O9 Mo3 Mo4 50.46(8) 1_554 5_665 ?
O7 Mo3 Mo4 139.57(8) . 5_665 ?
O2 Mo3 Mo4 138.70(9) 6_566 5_665 ?
O3 Mo3 Mo4 89.16(8) 1_554 5_665 ?
O10 Mo3 Mo4 51.23(7) 1_554 5_665 ?
O9 Mo3 Mo5 97.21(8) 1_554 2_545 ?
O7 Mo3 Mo5 93.38(8) . 2_545 ?
O2 Mo3 Mo5 136.88(9) 6_566 2_545 ?
O3 Mo3 Mo5 139.12(8) 1_554 2_545 ?
O10 Mo3 Mo5 49.31(8) 1_554 2_545 ?
Mo4 Mo3 Mo5 61.853(13) 5_665 2_545 ?
O9 Mo3 Mo5 47.60(8) 1_554 6_665 ?
O7 Mo3 Mo5 136.66(8) . 6_665 ?
O2 Mo3 Mo5 91.63(8) 6_566 6_665 ?
O3 Mo3 Mo5 130.34(8) 1_554 6_665 ?
O10 Mo3 Mo5 99.93(8) 1_554 6_665 ?
Mo4 Mo3 Mo5 62.752(12) 5_665 6_665 ?
Mo5 Mo3 Mo5 63.328(14) 2_545 6_665 ?
O9 Mo3 Mo2 137.64(8) 1_554 . ?
O7 Mo3 Mo2 46.63(8) . . ?
O2 Mo3 Mo2 86.91(9) 6_566 . ?
O3 Mo3 Mo2 138.23(8) 1_554 . ?
O10 Mo3 Mo2 90.44(8) 1_554 . ?
Mo4 Mo3 Mo2 122.547(19) 5_665 . ?
Mo5 Mo3 Mo2 60.705(13) 2_545 . ?
Mo5 Mo3 Mo2 90.508(14) 6_665 . ?
O9 Mo3 Mo1 89.79(8) 1_554 . ?
O7 Mo3 Mo1 86.29(8) . . ?
O2 Mo3 Mo1 46.04(8) 6_566 . ?
O3 Mo3 Mo1 129.75(8) 1_554 . ?
O10 Mo3 Mo1 139.60(8) 1_554 . ?
Mo4 Mo3 Mo1 122.833(16) 5_665 . ?
Mo5 Mo3 Mo1 91.075(14) 2_545 . ?
Mo5 Mo3 Mo1 60.095(14) 6_665 . ?
Mo2 Mo3 Mo1 57.849(13) . . ?
O9 Mo3 Mo6 128.76(9) 1_554 . ?
O7 Mo3 Mo6 41.23(9) . . ?
O2 Mo3 Mo6 40.53(9) 6_566 . ?
O3 Mo3 Mo6 90.94(9) 1_554 . ?
O10 Mo3 Mo6 129.57(9) 1_554 . ?
Mo4 Mo3 Mo6 179.19(4) 5_665 . ?
Mo5 Mo3 Mo6 118.46(4) 2_545 . ?
Mo5 Mo3 Mo6 116.63(4) 6_665 . ?
Mo2 Mo3 Mo6 57.76(4) . . ?
Mo1 Mo3 Mo6 56.56(4) . . ?
O9 Mo3 Ti1 129.43(8) 1_554 3_554 ?
O7 Mo3 Ti1 40.01(8) . 3_554 ?
O2 Mo3 Ti1 41.48(9) 6_566 3_554 ?
O3 Mo3 Ti1 86.04(9) 1_554 3_554 ?
O10 Mo3 Ti1 127.91(8) 1_554 3_554 ?
Mo4 Mo3 Ti1 175.14(4) 5_665 3_554 ?
Mo5 Mo3 Ti1 121.85(4) 2_545 3_554 ?
Mo5 Mo3 Ti1 121.28(4) 6_665 3_554 ?
Mo2 Mo3 Ti1 61.31(4) . 3_554 ?
Mo1 Mo3 Ti1 61.33(4) . 3_554 ?
Mo6 Mo3 Ti1 5.15(5) . 3_554 ?
O9 Mo4 O1 171.40(11) 5_666 6_676 ?
O9 Mo4 O5 86.14(11) 5_666 5_666 ?
O1 Mo4 O5 88.70(11) 6_676 5_666 ?
O9 Mo4 O10 100.76(11) 5_666 5_666 ?
O1 Mo4 O10 86.56(11) 6_676 5_666 ?
O5 Mo4 O10 95.38(11) 5_666 5_666 ?
O9 Mo4 O6 86.91(11) 5_666 4_664 ?
O1 Mo4 O6 85.41(11) 6_676 4_664 ?
O5 Mo4 O6 79.80(11) 5_666 4_664 ?
O10 Mo4 O6 170.72(11) 5_666 4_664 ?
O9 Mo4 Mo3 49.86(8) 5_666 5_665 ?
O1 Mo4 Mo3 137.74(8) 6_676 5_665 ?
O5 Mo4 Mo3 95.65(8) 5_666 5_665 ?
O10 Mo4 Mo3 51.20(8) 5_666 5_665 ?
O6 Mo4 Mo3 136.77(8) 4_664 5_665 ?
O9 Mo4 Mo5 95.81(8) 5_666 6_675 ?
O1 Mo4 Mo5 92.41(8) 6_676 6_675 ?
O5 Mo4 Mo5 143.88(8) 5_666 6_675 ?
O10 Mo4 Mo5 48.74(8) 5_666 6_675 ?
O6 Mo4 Mo5 136.28(7) 4_664 6_675 ?
Mo3 Mo4 Mo5 60.647(16) 5_665 6_675 ?
O9 Mo4 Mo1 136.34(8) 5_666 1_565 ?
O1 Mo4 Mo1 47.23(7) 6_676 1_565 ?
O5 Mo4 Mo1 135.26(8) 5_666 1_565 ?
O10 Mo4 Mo1 89.95(8) 5_666 1_565 ?
O6 Mo4 Mo1 88.02(7) 4_664 1_565 ?
Mo3 Mo4 Mo1 121.093(16) 5_665 1_565 ?
Mo5 Mo4 Mo1 60.480(13) 6_675 1_565 ?
O9 Mo4 Mo2 88.32(8) 5_666 1_565 ?
O1 Mo4 Mo2 89.11(8) 6_676 1_565 ?
O5 Mo4 Mo2 125.67(8) 5_666 1_565 ?
O10 Mo4 Mo2 138.62(8) 5_666 1_565 ?
O6 Mo4 Mo2 45.92(7) 4_664 1_565 ?
Mo3 Mo4 Mo2 120.387(15) 5_665 1_565 ?
Mo5 Mo4 Mo2 90.452(15) 6_675 1_565 ?
Mo1 Mo4 Mo2 58.461(12) 1_565 1_565 ?
O9 Mo4 Mo5 46.45(8) 5_666 2 ?
O1 Mo4 Mo5 137.49(7) 6_676 2 ?
O5 Mo4 Mo5 132.31(8) 5_666 2 ?
O10 Mo4 Mo5 98.08(8) 5_666 2 ?
O6 Mo4 Mo5 90.99(8) 4_664 2 ?
Mo3 Mo4 Mo5 60.492(12) 5_665 2 ?
Mo5 Mo4 Mo5 62.172(14) 6_675 2 ?
Mo1 Mo4 Mo5 90.373(13) 1_565 2 ?
Mo2 Mo4 Mo5 59.909(14) 1_565 2 ?
O9 Mo4 Ti1 87.57(9) 5_666 5_666 ?
O1 Mo4 Ti1 84.08(8) 6_676 5_666 ?
O5 Mo4 Ti1 39.16(8) 5_666 5_666 ?
O10 Mo4 Ti1 133.56(8) 5_666 5_666 ?
O6 Mo4 Ti1 40.73(8) 4_664 5_666 ?
Mo3 Mo4 Ti1 123.85(4) 5_665 5_666 ?
Mo5 Mo4 Ti1 175.48(4) 6_675 5_666 ?
Mo1 Mo4 Ti1 115.01(4) 1_565 5_666 ?
Mo2 Mo4 Ti1 86.65(4) 1_565 5_666 ?
Mo5 Mo4 Ti1 118.93(4) 2 5_666 ?
O9 Mo4 Mo6 82.49(9) 5_666 7_666 ?
O1 Mo4 Mo6 89.13(8) 6_676 7_666 ?
O5 Mo4 Mo6 40.12(8) 5_666 7_666 ?
O10 Mo4 Mo6 135.41(9) 5_666 7_666 ?
O6 Mo4 Mo6 39.87(8) 4_664 7_666 ?
Mo3 Mo4 Mo6 120.25(4) 5_665 7_666 ?
Mo5 Mo4 Mo6 175.71(4) 6_675 7_666 ?
Mo1 Mo4 Mo6 118.30(4) 1_565 7_666 ?
Mo2 Mo4 Mo6 85.57(4) 1_565 7_666 ?
Mo5 Mo4 Mo6 114.22(4) 2 7_666 ?
Ti1 Mo4 Mo6 5.17(5) 5_666 7_666 ?
O9 Mo5 O3 89.00(11) 6_566 1_554 ?
O9 Mo5 O10 170.50(11) 6_566 2_554 ?
O3 Mo5 O10 84.73(11) 1_554 2_554 ?
O9 Mo5 O8 89.28(11) 6_566 . ?
O3 Mo5 O8 90.92(11) 1_554 . ?
O10 Mo5 O8 83.71(11) 2_554 . ?
O9 Mo5 Mo3 136.99(8) 6_566 2 ?
O3 Mo5 Mo3 134.01(8) 1_554 2 ?
O10 Mo5 Mo3 49.70(8) 2_554 2 ?
O8 Mo5 Mo3 89.88(8) . 2 ?
O9 Mo5 Mo3 48.00(8) 6_566 6_565 ?
O3 Mo5 Mo3 92.73(8) 1_554 6_565 ?
O10 Mo5 Mo3 139.29(8) 2_554 6_565 ?
O8 Mo5 Mo3 137.00(8) . 6_565 ?
Mo3 Mo5 Mo3 116.672(14) 2 6_565 ?
O9 Mo5 Mo4 138.20(8) 6_566 6_575 ?
O3 Mo5 Mo4 90.10(8) 1_554 6_575 ?
O10 Mo5 Mo4 49.15(7) 2_554 6_575 ?
O8 Mo5 Mo4 132.51(8) . 6_575 ?
Mo3 Mo5 Mo4 57.500(12) 2 6_575 ?
Mo3 Mo5 Mo4 90.332(14) 6_565 6_575 ?
O9 Mo5 Mo1 90.93(8) 6_566 6_565 ?
O3 Mo5 Mo1 46.12(8) 1_554 6_565 ?
O10 Mo5 Mo1 89.86(8) 2_554 6_565 ?
O8 Mo5 Mo1 137.01(8) . 6_565 ?
Mo3 Mo5 Mo1 117.477(16) 2 6_565 ?
Mo3 Mo5 Mo1 61.210(12) 6_565 6_565 ?
Mo4 Mo5 Mo1 60.009(16) 6_575 6_565 ?
O9 Mo5 Mo2 88.85(8) 6_566 2 ?
O3 Mo5 Mo2 137.09(8) 1_554 2 ?
O10 Mo5 Mo2 90.89(8) 2_554 2 ?
O8 Mo5 Mo2 46.21(8) . 2 ?
Mo3 Mo5 Mo2 60.964(13) 2 2 ?
Mo3 Mo5 Mo2 116.548(14) 6_565 2 ?
Mo4 Mo5 Mo2 118.455(18) 6_575 2 ?
Mo1 Mo5 Mo2 176.775(16) 6_565 2 ?
O9 Mo5 Mo4 47.37(8) 6_566 2_545 ?
O3 Mo5 Mo4 136.09(8) 1_554 2_545 ?
O10 Mo5 Mo4 139.16(8) 2_554 2_545 ?
O8 Mo5 Mo4 92.83(8) . 2_545 ?
Mo3 Mo5 Mo4 89.750(14) 2 2_545 ?
Mo3 Mo5 Mo4 56.756(14) 6_565 2_545 ?
Mo4 Mo5 Mo4 117.827(14) 6_575 2_545 ?
Mo1 Mo5 Mo4 117.954(16) 6_565 2_545 ?
Mo2 Mo5 Mo4 59.804(12) 2 2_545 ?
O9 Mo5 Mo5 93.13(8) 6_566 5_565 ?
O3 Mo5 Mo5 134.83(8) 1_554 5_565 ?
O10 Mo5 Mo5 96.35(8) 2_554 5_565 ?
O8 Mo5 Mo5 134.19(8) . 5_565 ?
Mo3 Mo5 Mo5 58.655(12) 2 5_565 ?
Mo3 Mo5 Mo5 58.017(13) 6_565 5_565 ?
Mo4 Mo5 Mo5 59.704(13) 6_575 5_565 ?
Mo1 Mo5 Mo5 88.721(17) 6_565 5_565 ?
Mo2 Mo5 Mo5 88.078(17) 2 5_565 ?
Mo4 Mo5 Mo5 58.123(15) 2_545 5_565 ?
O9 Mo5 Sr1 132.78(8) 6_566 . ?
O3 Mo5 Sr1 86.49(8) 1_554 . ?
O10 Mo5 Sr1 39.81(8) 2_554 . ?
O8 Mo5 Sr1 43.90(8) . . ?
Mo3 Mo5 Sr1 63.459(12) 2 . ?
Mo3 Mo5 Sr1 178.853(14) 6_565 . ?
Mo4 Mo5 Sr1 88.829(13) 6_575 . ?
Mo1 Mo5 Sr1 117.667(13) 6_565 . ?
Mo2 Mo5 Sr1 64.562(11) 2 . ?
Mo4 Mo5 Sr1 124.360(15) 2_545 . ?
Mo5 Mo5 Sr1 122.100(17) 5_565 . ?
O9 Sr1 O4 71.82(9) 5_666 4_564 ?
O9 Sr1 O7 67.82(9) 5_666 2 ?
O4 Sr1 O7 67.68(10) 4_564 2 ?
O9 Sr1 O1 99.32(9) 5_666 5_666 ?
O4 Sr1 O1 64.36(10) 4_564 5_666 ?
O7 Sr1 O1 131.94(9) 2 5_666 ?
O9 Sr1 O10 95.19(9) 5_666 2_554 ?
O4 Sr1 O10 134.09(10) 4_564 2_554 ?
O7 Sr1 O10 66.68(9) 2 2_554 ?
O1 Sr1 O10 159.98(8) 5_666 2_554 ?
O9 Sr1 O3 61.64(8) 5_666 5_666 ?
O4 Sr1 O3 98.95(9) 4_564 5_666 ?
O7 Sr1 O3 129.31(8) 2 5_666 ?
O1 Sr1 O3 63.01(8) 5_666 5_666 ?
O10 Sr1 O3 113.39(9) 2_554 5_666 ?
O9 Sr1 O8 130.43(9) 5_666 . ?
O4 Sr1 O8 94.38(9) 4_564 . ?
O7 Sr1 O8 62.98(8) 2 . ?
O1 Sr1 O8 117.48(8) 5_666 . ?
O10 Sr1 O8 60.37(8) 2_554 . ?
O3 Sr1 O8 164.79(8) 5_666 . ?
O9 Sr1 O10 119.64(9) 5_666 6_666 ?
O4 Sr1 O10 126.72(10) 4_564 6_666 ?
O7 Sr1 O10 164.48(8) 2 6_666 ?
O1 Sr1 O10 62.45(8) 5_666 6_666 ?
O10 Sr1 O10 98.31(7) 2_554 6_666 ?
O3 Sr1 O10 58.98(8) 5_666 6_666 ?
O8 Sr1 O10 106.90(8) . 6_666 ?
O9 Sr1 O6 133.66(8) 5_666 6_566 ?
O4 Sr1 O6 61.84(8) 4_564 6_566 ?
O7 Sr1 O6 92.90(9) 2 6_566 ?
O1 Sr1 O6 61.99(8) 5_666 6_566 ?
O10 Sr1 O6 115.94(8) 2_554 6_566 ?
O3 Sr1 O6 124.67(8) 5_666 6_566 ?
O8 Sr1 O6 56.46(8) . 6_566 ?
O10 Sr1 O6 90.29(8) 6_666 6_566 ?
O9 Sr1 O2 60.49(8) 5_666 2_654 ?
O4 Sr1 O2 132.19(8) 4_564 2_654 ?
O7 Sr1 O2 95.81(9) 2 2_654 ?
O1 Sr1 O2 118.43(8) 5_666 2_654 ?
O10 Sr1 O2 58.14(8) 2_554 2_654 ?
O3 Sr1 O2 56.24(8) 5_666 2_654 ?
O8 Sr1 O2 118.35(8) . 2_654 ?
O10 Sr1 O2 78.38(8) 6_666 2_654 ?
O6 Sr1 O2 165.69(8) 6_566 2_654 ?
O9 Sr1 O2 170.28(8) 5_666 6_566 ?
O4 Sr1 O2 117.86(9) 4_564 6_566 ?
O7 Sr1 O2 115.54(8) 2 6_566 ?
O1 Sr1 O2 85.07(8) 5_666 6_566 ?
O10 Sr1 O2 78.62(8) 2_554 6_566 ?
O3 Sr1 O2 113.75(8) 5_666 6_566 ?
O8 Sr1 O2 52.68(8) . 6_566 ?
O10 Sr1 O2 54.80(8) 6_666 6_566 ?
O6 Sr1 O2 56.04(8) 6_566 6_566 ?
O2 Sr1 O2 109.79(7) 2_654 6_566 ?
O9 Sr1 Mo2 102.27(6) 5_666 7_666 ?
O4 Sr1 Mo2 35.66(7) 4_564 7_666 ?
O7 Sr1 Mo2 95.96(7) 2 7_666 ?
O1 Sr1 Mo2 39.51(6) 5_666 7_666 ?
O10 Sr1 Mo2 148.57(6) 2_554 7_666 ?
O3 Sr1 Mo2 97.93(6) 5_666 7_666 ?
O8 Sr1 Mo2 88.62(6) . 7_666 ?
O10 Sr1 Mo2 95.49(6) 6_666 7_666 ?
O6 Sr1 Mo2 35.71(5) 6_566 7_666 ?
O2 Sr1 Mo2 153.01(6) 2_654 7_666 ?
O2 Sr1 Mo2 86.66(6) 6_566 7_666 ?
Mo6 Ti1 O5 120.8(6) 3 . ?
Mo6 Ti1 O6 107.7(6) 3 8_557 ?
O5 Ti1 O6 91.95(15) . 8_557 ?
Mo6 Ti1 O8 131.1(7) 3 3 ?
O5 Ti1 O8 102.33(15) . 3 ?
O6 Ti1 O8 91.58(14) 8_557 3 ?
Mo6 Ti1 O7 63.6(6) 3 3 ?
O5 Ti1 O7 94.11(14) . 3 ?
O6 Ti1 O7 171.17(16) 8_557 3 ?
O8 Ti1 O7 93.41(14) 3 3 ?
Mo6 Ti1 O2 50.6(6) 3 8_557 ?
O5 Ti1 O2 171.23(17) . 8_557 ?
O6 Ti1 O2 92.72(14) 8_557 8_557 ?
O8 Ti1 O2 84.96(14) 3 8_557 ?
O7 Ti1 O2 80.47(13) 3 8_557 ?
Mo6 Ti1 O4 36.1(6) 3 8_657 ?
O5 Ti1 O4 90.52(15) . 8_657 ?
O6 Ti1 O4 91.25(14) 8_557 8_657 ?
O8 Ti1 O4 166.74(16) 3 8_657 ?
O7 Ti1 O4 82.28(14) 3 8_657 ?
O2 Ti1 O4 81.97(14) 8_557 8_657 ?
Mo6 Ti1 Mo4 128.6(6) 3 5_666 ?
O5 Ti1 Mo4 45.45(9) . 5_666 ?
O6 Ti1 Mo4 46.62(10) 8_557 5_666 ?
O8 Ti1 Mo4 97.47(11) 3 5_666 ?
O7 Ti1 Mo4 139.48(12) 3 5_666 ?
O2 Ti1 Mo4 139.20(11) 8_557 5_666 ?
O4 Ti1 Mo4 93.88(11) 8_657 5_666 ?
Mo6 Ti1 Mo2 34.8(6) 3 3 ?
O5 Ti1 Mo2 91.73(11) . 3 ?
O6 Ti1 Mo2 132.05(12) 8_557 3 ?
O8 Ti1 Mo2 133.89(12) 3 3 ?
O7 Ti1 Mo2 41.39(9) 3 3 ?
O2 Ti1 Mo2 79.64(10) 8_557 3 ?
O4 Ti1 Mo2 40.93(10) 8_657 3 ?
Mo4 Ti1 Mo2 122.16(7) 5_666 3 ?
Mo6 Ti1 Mo1 18.0(5) 3 3 ?
O5 Ti1 Mo1 131.32(13) . 3 ?
O6 Ti1 Mo1 91.64(11) 8_557 3 ?
O8 Ti1 Mo1 126.07(12) 3 3 ?
O7 Ti1 Mo1 79.53(10) 3 3 ?
O2 Ti1 Mo1 41.12(9) 8_557 3 ?
O4 Ti1 Mo1 40.87(9) 8_657 3 ?
Mo4 Ti1 Mo1 122.26(6) 5_666 3 ?
Mo2 Ti1 Mo1 52.47(3) 3 3 ?
Mo6 Ti1 Mo3 46.2(6) 3 3 ?
O5 Ti1 Mo3 133.71(12) . 3 ?
O6 Ti1 Mo3 133.29(12) 8_557 3 ?
O8 Ti1 Mo3 87.84(11) 3 3 ?
O7 Ti1 Mo3 39.81(9) 3 3 ?
O2 Ti1 Mo3 40.69(9) 8_557 3 ?
O4 Ti1 Mo3 80.81(11) 8_657 3 ?
Mo4 Ti1 Mo3 174.68(7) 5_666 3 ?
Mo2 Ti1 Mo3 53.18(3) 3 3 ?
Mo1 Ti1 Mo3 53.43(3) 3 3 ?
Mo6 Ti1 Sr1 108.6(6) 3 3 ?
O5 Ti1 Sr1 126.80(12) . 3 ?
O6 Ti1 Sr1 52.93(10) 8_557 3 ?
O8 Ti1 Sr1 49.93(10) 3 3 ?
O7 Ti1 Sr1 126.59(11) 3 3 ?
O2 Ti1 Sr1 61.71(9) 8_557 3 ?
O4 Ti1 Sr1 123.81(11) 8_657 3 ?
Mo4 Ti1 Sr1 88.90(5) 5_666 3 ?
Mo2 Ti1 Sr1 141.24(6) 3 3 ?
Mo1 Ti1 Sr1 92.62(5) 3 3 ?
Mo3 Ti1 Sr1 94.32(5) 3 3 ?
Ti1 Mo6 O4 137.3(7) 3_554 6_666 ?
Ti1 Mo6 O2 120.9(7) 3_554 6_566 ?
O4 Mo6 O2 95.71(16) 6_666 6_566 ?
Ti1 Mo6 O7 106.7(6) 3_554 . ?
O4 Mo6 O7 93.78(16) 6_666 . ?
O2 Mo6 O7 89.47(15) 6_566 . ?
Ti1 Mo6 O6 62.5(6) 3_554 6_566 ?
O4 Mo6 O6 95.67(16) 6_666 6_566 ?
O2 Mo6 O6 94.96(15) 6_566 6_566 ?
O7 Mo6 O6 169.11(16) . 6_566 ?
Ti1 Mo6 O5 50.5(6) 3_554 3_554 ?
O4 Mo6 O5 92.82(16) 6_666 3_554 ?
O2 Mo6 O5 171.25(17) 6_566 3_554 ?
O7 Mo6 O5 91.91(14) . 3_554 ?
O6 Mo6 O5 82.24(14) 6_566 3_554 ?
Ti1 Mo6 O8 41.6(6) 3_554 . ?
O4 Mo6 O8 176.43(17) 6_666 . ?
O2 Mo6 O8 83.69(15) 6_566 . ?
O7 Mo6 O8 89.74(14) . . ?
O6 Mo6 O8 80.89(13) 6_566 . ?
O5 Mo6 O8 87.67(14) 3_554 . ?
Ti1 Mo6 Mo1 159.6(6) 3_554 . ?
O4 Mo6 Mo1 47.73(11) 6_666 . ?
O2 Mo6 Mo1 48.01(10) 6_566 . ?
O7 Mo6 Mo1 91.21(11) . . ?
O6 Mo6 Mo1 99.15(11) 6_566 . ?
O5 Mo6 Mo1 140.55(13) 3_554 . ?
O8 Mo6 Mo1 131.66(12) . . ?
Ti1 Mo6 Mo2 140.9(6) 3_554 . ?
O4 Mo6 Mo2 46.60(11) 6_666 . ?
O2 Mo6 Mo2 91.15(12) 6_566 . ?
O7 Mo6 Mo2 47.30(9) . . ?
O6 Mo6 Mo2 142.23(13) 6_566 . ?
O5 Mo6 Mo2 96.13(11) 3_554 . ?
O8 Mo6 Mo2 136.87(12) . . ?
Mo1 Mo6 Mo2 59.10(4) . . ?
Ti1 Mo6 Mo3 128.6(6) 3_554 . ?
O4 Mo6 Mo3 92.23(13) 6_666 . ?
O2 Mo6 Mo3 45.24(10) 6_566 . ?
O7 Mo6 Mo3 44.58(10) . . ?
O6 Mo6 Mo3 140.07(13) 6_566 . ?
O5 Mo6 Mo3 136.43(12) 3_554 . ?
O8 Mo6 Mo3 89.84(10) . . ?
Mo1 Mo6 Mo3 59.37(5) . . ?
Mo2 Mo6 Mo3 58.56(4) . . ?
Ti1 Mo6 Mo4 46.2(6) 3_554 7_656 ?
O4 Mo6 Mo4 92.51(13) 6_666 7_656 ?
O2 Mo6 Mo4 136.52(13) 6_566 7_656 ?
O7 Mo6 Mo4 132.51(13) . 7_656 ?
O6 Mo6 Mo4 41.67(9) 6_566 7_656 ?
O5 Mo6 Mo4 40.76(9) 3_554 7_656 ?
O8 Mo6 Mo4 85.55(10) . 7_656 ?
Mo1 Mo6 Mo4 125.91(8) . 7_656 ?
Mo2 Mo6 Mo4 123.87(8) . 7_656 ?
Mo3 Mo6 Mo4 174.65(8) . 7_656 ?
Ti1 Mo6 Sr1 66.2(6) 3_554 . ?
O4 Mo6 Sr1 128.97(13) 6_666 . ?
O2 Mo6 Sr1 58.86(11) 6_566 . ?
O7 Mo6 Sr1 125.81(12) . . ?
O6 Mo6 Sr1 50.14(9) 6_566 . ?
O5 Mo6 Sr1 113.81(11) 3_554 . ?
O8 Mo6 Sr1 47.84(9) . . ?
Mo1 Mo6 Sr1 95.66(6) . . ?
Mo2 Mo6 Sr1 150.00(8) . . ?
Mo3 Mo6 Sr1 95.76(6) . . ?
Mo4 Mo6 Sr1 83.16(5) 7_656 . ?
Mo1 O1 Mo4 84.07(10) 6_566 6_576 ?
Mo1 O1 Mo2 134.27(14) 6_566 3 ?
Mo4 O1 Mo2 131.75(13) 6_576 3 ?
Mo1 O1 Sr1 104.41(11) 6_566 5_666 ?
Mo4 O1 Sr1 109.36(11) 6_576 5_666 ?
Mo2 O1 Sr1 90.33(9) 3 5_666 ?
Mo6 O2 Mo1 87.44(14) 6_666 6_666 ?
Mo6 O2 Mo3 94.23(14) 6_666 6_666 ?
Mo1 O2 Mo3 86.03(12) 6_666 6_666 ?
Mo6 O2 Ti1 8.48(7) 6_666 8_657 ?
Mo1 O2 Ti1 95.34(14) 6_666 8_657 ?
Mo3 O2 Ti1 97.84(13) 6_666 8_657 ?
Mo6 O2 Sr1 147.02(15) 6_666 2_646 ?
Mo1 O2 Sr1 125.20(12) 6_666 2_646 ?
Mo3 O2 Sr1 84.58(10) 6_666 2_646 ?
Ti1 O2 Sr1 139.42(14) 8_657 2_646 ?
Mo6 O2 Sr1 90.90(12) 6_666 6_666 ?
Mo1 O2 Sr1 134.32(12) 6_666 6_666 ?
Mo3 O2 Sr1 139.55(13) 6_666 6_666 ?
Ti1 O2 Sr1 83.17(10) 8_657 6_666 ?
Sr1 O2 Sr1 70.21(7) 2_646 6_666 ?
Mo1 O3 Mo5 85.89(11) 6_566 1_556 ?
Mo1 O3 Mo3 134.07(15) 6_566 1_556 ?
Mo5 O3 Mo3 130.44(15) 1_556 1_556 ?
Mo1 O3 Sr1 99.80(11) 6_566 5_666 ?
Mo5 O3 Sr1 109.93(11) 1_556 5_666 ?
Mo3 O3 Sr1 92.89(10) 1_556 5_666 ?
Mo6 O4 Mo2 91.18(17) 6_566 6_566 ?
Mo6 O4 Mo1 89.17(16) 6_566 6_566 ?
Mo2 O4 Mo1 84.54(13) 6_566 6_566 ?
Mo6 O4 Ti1 6.63(10) 6_566 8_557 ?
Mo2 O4 Ti1 94.83(16) 6_566 8_557 ?
Mo1 O4 Ti1 95.02(15) 6_566 8_557 ?
Mo6 O4 Sr1 132.37(16) 6_566 4_565 ?
Mo2 O4 Sr1 96.45(12) 6_566 4_565 ?
Mo1 O4 Sr1 138.28(16) 6_566 4_565 ?
Ti1 O4 Sr1 126.25(14) 8_557 4_565 ?
Ti1 O5 Mo6 8.74(7) . 3 ?
Ti1 O5 Mo4 95.39(13) . 5_666 ?
Mo6 O5 Mo4 99.12(13) 3 5_666 ?
Ti1 O5 Mo1 135.67(16) . 6_566 ?
Mo6 O5 Mo1 129.02(15) 3 6_566 ?
Mo4 O5 Mo1 125.54(13) 5_666 6_566 ?
Ti1 O6 Mo2 177.23(18) 8_657 4_655 ?
Ti1 O6 Mo6 9.77(6) 8_657 6_666 ?
Mo2 O6 Mo6 172.06(17) 4_655 6_666 ?
Ti1 O6 Mo4 92.65(13) 8_657 4_665 ?
Mo2 O6 Mo4 84.63(11) 4_655 4_665 ?
Mo6 O6 Mo4 98.46(13) 6_666 4_665 ?
Ti1 O6 Sr1 95.89(12) 8_657 6_666 ?
Mo2 O6 Sr1 85.59(9) 4_655 6_666 ?
Mo6 O6 Sr1 97.53(13) 6_666 6_666 ?
Mo4 O6 Sr1 132.21(11) 4_665 6_666 ?
Mo6 O7 Mo2 88.27(13) . . ?
Mo6 O7 Mo3 94.19(13) . . ?
Mo2 O7 Mo3 85.85(10) . . ?
Mo6 O7 Ti1 9.69(6) . 3_554 ?
Mo2 O7 Ti1 96.27(13) . 3_554 ?
Mo3 O7 Ti1 100.19(13) . 3_554 ?
Mo6 O7 Sr1 157.12(15) . 2_545 ?
Mo2 O7 Sr1 107.22(11) . 2_545 ?
Mo3 O7 Sr1 103.44(11) . 2_545 ?
Ti1 O7 Sr1 147.58(14) 3_554 2_545 ?
Ti1 O8 Mo2 128.17(16) 3_554 2 ?
Ti1 O8 Mo5 134.39(15) 3_554 . ?
Mo2 O8 Mo5 85.40(11) 2 . ?
Ti1 O8 Mo6 7.29(9) 3_554 . ?
Mo2 O8 Mo6 135.37(16) 2 . ?
Mo5 O8 Mo6 128.85(14) . . ?
Ti1 O8 Sr1 99.12(12) 3_554 . ?
Mo2 O8 Sr1 98.86(10) 2 . ?
Mo5 O8 Sr1 105.41(11) . . ?
Mo6 O8 Sr1 97.73(11) . . ?
Mo5 O9 Mo3 84.40(10) 6_666 1_556 ?
Mo5 O9 Mo4 86.18(10) 6_666 5_666 ?
Mo3 O9 Mo4 79.68(10) 1_556 5_666 ?
Mo5 O9 Sr1 139.34(13) 6_666 5_666 ?
Mo3 O9 Sr1 102.78(11) 1_556 5_666 ?
Mo4 O9 Sr1 134.40(13) 5_666 5_666 ?
Mo5 O10 Mo3 80.99(10) 2_546 1_556 ?
Mo5 O10 Mo4 82.11(10) 2_546 5_666 ?
Mo3 O10 Mo4 77.57(9) 1_556 5_666 ?
Mo5 O10 Sr1 110.51(11) 2_546 2_546 ?
Mo3 O10 Sr1 98.61(10) 1_556 2_546 ?
Mo4 O10 Sr1 166.29(14) 5_666 2_546 ?
Mo5 O10 Sr1 106.14(11) 2_546 6_566 ?
Mo3 O10 Sr1 172.33(13) 1_556 6_566 ?
Mo4 O10 Sr1 100.34(10) 5_666 6_566 ?
Sr1 O10 Sr1 81.69(7) 2_546 6_566 ?

_diffrn_measured_fraction_theta_max    0.813
_diffrn_reflns_theta_full              44.95
_diffrn_measured_fraction_theta_full   0.813
_refine_diff_density_max    3.404
_refine_diff_density_min   -2.852
_refine_diff_density_rms    0.558

#===END


data_euti97

_audit_creation_method            SHELXL-97
_chemical_name_systematic
;
 ?
;
_chemical_name_common             ?
_chemical_formula_moiety          ?
_chemical_formula_sum
 'Eu Mo5.30 O10 Ti0.70'
_chemical_formula_weight          853.97

loop_
 _atom_type_symbol
 _atom_type_description
 _atom_type_scat_dispersion_real
 _atom_type_scat_dispersion_imag
 _atom_type_scat_source
 'Eu'  'Eu'  -0.1578   3.6682
 'International Tables Vol C Tables 4.2.6.8 and 6.1.1.4'
 'Ti'  'Ti'   0.2776   0.4457
 'International Tables Vol C Tables 4.2.6.8 and 6.1.1.4'
 'Mo'  'Mo'  -1.6832   0.6857
 'International Tables Vol C Tables 4.2.6.8 and 6.1.1.4'
 'O'  'O'   0.0106   0.0060
 'International Tables Vol C Tables 4.2.6.8 and 6.1.1.4'

_symmetry_cell_setting            orthorhombic
_symmetry_space_group_name_H-M    Pbca

loop_
 _symmetry_equiv_pos_as_xyz
 'x, y, z'
 '-x+1/2, y+1/2, z'
 'x, -y+1/2, z+1/2'
 '-x+1/2, -y, z+1/2'
 '-x, -y, -z'
 'x-1/2, -y-1/2, -z'
 '-x, y-1/2, -z-1/2'
 'x-1/2, y, -z-1/2'

_cell_length_a                    9.1069(7)
_cell_length_b                    11.421(2)
_cell_length_c                    15.0750(10)
_cell_angle_alpha                 90.00
_cell_angle_beta                  90.00
_cell_angle_gamma                 90.00
_cell_volume                      1567.9(3)
_cell_formula_units_Z             8
_cell_measurement_temperature     293(2)
_cell_measurement_reflns_used     25
_cell_measurement_theta_min       11.45
_cell_measurement_theta_max       29.40

_exptl_crystal_description        'irregular fragment'
_exptl_crystal_colour             black
_exptl_crystal_size_max           0.2
_exptl_crystal_size_mid           0.16
_exptl_crystal_size_min           0.14
_exptl_crystal_density_meas       ?
_exptl_crystal_density_diffrn     7.235
_exptl_crystal_density_method     'not measured'
_exptl_crystal_F_000              3048
_exptl_absorpt_coefficient_mu     16.800
_exptl_absorpt_correction_type    psi-scan
_exptl_absorpt_process_details    '(North, Phillips & Mathews, 1968)'
_exptl_absorpt_correction_T_min   0.068
_exptl_absorpt_correction_T_max   0.095

_exptl_special_details
;
 ?
;


_diffrn_ambient_temperature       293(2)
_diffrn_radiation_wavelength      0.71073
_diffrn_radiation_type            MoK\a
_diffrn_radiation_source          'fine-focus sealed tube'
_diffrn_radiation_monochromator   graphite
_diffrn_measurement_device        'Enraf-Nonius CAD-4'
_diffrn_measurement_method        \q-2\q
_diffrn_detector_area_resol_mean  ?
_diffrn_standards_number          3
_diffrn_standards_interval_count  ?
_diffrn_standards_interval_time   3600
_diffrn_standards_decay_%        <1%
_diffrn_reflns_number             6449
_diffrn_reflns_av_R_equivalents   0.0000
_diffrn_reflns_av_sigmaI/netI     0.0236
_diffrn_reflns_limit_h_min        0
_diffrn_reflns_limit_h_max        18
_diffrn_reflns_limit_k_min        0
_diffrn_reflns_limit_k_max        22
_diffrn_reflns_limit_l_min        -29
_diffrn_reflns_limit_l_max        0
_diffrn_reflns_theta_min          2.70
_diffrn_reflns_theta_max          45.00
_reflns_number_total              6449
_reflns_number_gt                 5286
_reflns_threshold_expression      >2sigma(I)

_computing_data_collection        'CAD 4 Software (Enraf-Nonius, 1989)'
_computing_cell_refinement        'CAD 4 Software (Enraf-Nonius, 1989)'
_computing_data_reduction         'MolEN (Fair, 1990)'
_computing_structure_solution     'SHELXS (Sheldrick, 1990)'
_computing_structure_refinement   'SHELXL-97 (Sheldrick, 1997)'
_computing_molecular_graphics     'ORTEPII (Johnson, 1976)'
_computing_publication_material    'SHELXL-97 (Sheldrick, 1997)'

_refine_special_details
;
 Refinement of F^2^ against ALL reflections.  The weighted R-factor wR and
 goodness of fit S are based on F^2^, conventional R-factors R are based
 on F, with F set to zero for negative F^2^. The threshold expression of
 F^2^ > 2sigma(F^2^) is used only for calculating R-factors(gt) etc. and is
 not relevant to the choice of reflections for refinement.  R-factors based
 on F^2^ are statistically about twice as large as those based on F, and R-
 factors based on ALL data will be even larger.
;

_refine_ls_structure_factor_coef  Fsqd
_refine_ls_matrix_type            full
_refine_ls_weighting_scheme
 'calc w=1/[\s^2^(Fo^2^)+(0.0163P)^2^+43.4046P] where P=(Fo^2^+2Fc^2^)/3'
_atom_sites_solution_primary      direct
_atom_sites_solution_secondary    difmap
_atom_sites_solution_hydrogens    geom
_refine_ls_hydrogen_treatment     mixed
_refine_ls_extinction_method      SHELXL
_refine_ls_extinction_coef        0.00116(3)
_refine_ls_extinction_expression
 'Fc^*^=kFc[1+0.001xFc^2^\l^3^/sin(2\q)]^-1/4^'
_refine_ls_number_reflns          6449
_refine_ls_number_parameters      160
_refine_ls_number_restraints      1
_refine_ls_R_factor_all           0.0466
_refine_ls_R_factor_gt            0.0347
_refine_ls_wR_factor_ref          0.0868
_refine_ls_wR_factor_gt           0.0843
_refine_ls_goodness_of_fit_ref    1.278
_refine_ls_restrained_S_all       1.278
_refine_ls_shift/su_max           0.001
_refine_ls_shift/su_mean          0.000

loop_
 _atom_site_label
 _atom_site_type_symbol
 _atom_site_fract_x
 _atom_site_fract_y
 _atom_site_fract_z
 _atom_site_U_iso_or_equiv
 _atom_site_adp_type
 _atom_site_occupancy
 _atom_site_calc_flag
 _atom_site_refinement_flags
 _atom_site_disorder_assembly
 _atom_site_disorder_group
Eu1 Eu 0.49232(2) 0.58821(2) 0.099944(16) 0.00675(4) Uani 1 d . . .
Mo1 Mo 0.62262(4) 0.17763(3) 0.13469(2) 0.00276(5) Uani 1 d . . .
Mo2 Mo 0.38616(4) 0.05371(3) 0.18744(2) 0.00309(5) Uani 1 d . . .
Mo3 Mo 0.37373(4) 0.17202(3) 0.02656(2) 0.00143(5) Uani 1 d . . .
Mo4 Mo 0.63238(4) 0.93722(3) 0.12606(2) 0.00150(5) Uani 1 d . . .
Mo5 Mo 0.12546(4) 0.43497(3) 0.02737(2) 0.00096(5) Uani 1 d . . .
Mo6 Mo 0.3843(2) 0.29522(18) 0.19614(9) 0.00200(12) Uani 0.302(3) d P . .
Ti1 Ti 0.36167(17) 0.18079(16) 0.70342(8) 0.00200(12) Uani 0.698(3) d P . .
O1 O 0.2630(4) 0.4398(3) 0.8100(2) 0.0038(4) Uani 1 d . . .
O2 O 0.9909(4) 0.1947(3) 0.9124(2) 0.0070(5) Uani 1 d . . .
O3 O 0.2561(3) 0.3094(3) 0.9697(2) 0.0030(4) Uani 1 d . . .
O4 O 0.0022(4) 0.3187(3) 0.7544(3) 0.0097(6) Uani 1 d . . .
O5 O 0.2547(4) 0.1933(3) 0.8067(2) 0.0039(4) Uani 1 d . . .
O6 O 0.9879(3) 0.0663(3) 0.7455(2) 0.0032(4) Uani 1 d . . .
O7 O 0.2536(4) 0.1829(3) 0.1416(2) 0.0044(4) Uani 1 d . . .
O8 O 0.2569(4) 0.4350(3) 0.1399(2) 0.0042(4) Uani 1 d . . .
O9 O 0.5038(3) 0.1943(3) 0.91776(19) 0.0025(4) Uani 1 d . . .
O10 O 0.2205(3) 0.0521(3) 0.9790(2) 0.0033(4) Uani 1 d . . .

loop_
 _atom_site_aniso_label
 _atom_site_aniso_U_11
 _atom_site_aniso_U_22
 _atom_site_aniso_U_33
 _atom_site_aniso_U_23
 _atom_site_aniso_U_13
 _atom_site_aniso_U_12
Eu1 0.00636(7) 0.00713(7) 0.00676(8) -0.00050(6) -0.00095(6) 0.00052(6)
Mo1 0.00287(10) 0.00383(11) 0.00157(10) 0.00171(8) -0.00117(8) -0.00245(9)
Mo2 0.00196(10) 0.00653(12) 0.00115(10) 0.00219(9) 0.00020(8) 0.00000(9)
Mo3 0.00192(10) 0.00042(9) 0.00195(10) 0.00064(8) 0.00022(8) 0.00037(8)
Mo4 0.00181(10) 0.00187(10) 0.00082(10) -0.00005(8) -0.00026(8) 0.00015(8)
Mo5 0.00159(10) 0.00062(9) 0.00068(10) 0.00027(7) -0.00009(8) -0.00004(8)
Mo6 0.0034(3) 0.0009(5) 0.0017(2) 0.00043(19) 0.0005(2) -0.0003(2)
Ti1 0.0034(3) 0.0009(5) 0.0017(2) 0.00043(19) 0.0005(2) -0.0003(2)
O1 0.0057(10) 0.0035(9) 0.0023(9) 0.0009(8) 0.0007(8) -0.0006(8)
O2 0.0044(10) 0.0075(11) 0.0091(12) -0.0060(9) -0.0002(9) 0.0000(9)
O3 0.0031(9) 0.0031(9) 0.0030(9) -0.0004(8) -0.0008(8) 0.0022(8)
O4 0.0107(12) 0.0051(11) 0.0133(13) -0.0040(10) -0.0101(11) 0.0032(11)
O5 0.0046(9) 0.0038(9) 0.0032(9) 0.0008(8) 0.0011(8) 0.0023(8)
O6 0.0041(9) 0.0029(9) 0.0026(9) -0.0003(7) 0.0004(7) 0.0024(8)
O7 0.0056(10) 0.0034(10) 0.0042(9) -0.0010(8) 0.0030(8) -0.0001(8)
O8 0.0050(10) 0.0043(10) 0.0032(9) 0.0001(8) -0.0017(8) 0.0027(8)
O9 0.0032(9) 0.0014(8) 0.0029(9) 0.0006(7) 0.0009(7) 0.0005(7)
O10 0.0052(10) 0.0025(9) 0.0020(9) -0.0009(8) -0.0004(7) 0.0011(8)

_geom_special_details
;
 All esds (except the esd in the dihedral angle between two l.s. planes)
 are estimated using the full covariance matrix.  The cell esds are taken
 into account individually in the estimation of esds in distances, angles
 and torsion angles; correlations between esds in cell parameters are only
 used when they are defined by crystal symmetry.  An approximate (isotropic)
 treatment of cell esds is used for estimating esds involving l.s. planes.
;

loop_
 _geom_bond_atom_site_label_1
 _geom_bond_atom_site_label_2
 _geom_bond_distance
 _geom_bond_site_symmetry_2
 _geom_bond_publ_flag
Eu1 O9 2.498(3) 5_666 ?
Eu1 O4 2.561(4) 4_564 ?
Eu1 O7 2.565(3) 2 ?
Eu1 O1 2.629(3) 5_666 ?
Eu1 O10 2.693(3) 2_554 ?
Eu1 O3 2.778(3) 5_666 ?
Eu1 O8 2.832(3) . ?
Eu1 O10 2.881(3) 6_666 ?
Eu1 O6 2.923(3) 6_566 ?
Eu1 O2 3.082(4) 2_654 ?
Eu1 Mo2 3.4137(5) 7_666 ?
Eu1 Mo3 3.5530(5) 5_665 ?
Mo1 O3 1.994(3) 6_666 ?
Mo1 O4 2.000(4) 6_666 ?
Mo1 O2 2.017(4) 6_566 ?
Mo1 O1 2.032(3) 6_666 ?
Mo1 O5 2.098(3) 6_666 ?
Mo1 Mo2 2.6967(5) . ?
Mo1 Mo6 2.715(2) . ?
Mo1 Mo4 2.7502(7) 1_545 ?
Mo1 Mo5 2.7611(5) 6_665 ?
Mo1 Mo3 2.7926(5) . ?
Mo1 Ti1 3.055(2) 3_554 ?
Mo1 Eu1 3.6898(5) 2_645 ?
Mo2 O6 1.990(3) 4_654 ?
Mo2 O4 2.002(4) 6_666 ?
Mo2 O8 2.012(3) 2_545 ?
Mo2 O7 2.028(3) . ?
Mo2 O1 2.162(3) 3_554 ?
Mo2 Mo6 2.761(2) . ?
Mo2 Mo4 2.7666(5) 1_545 ?
Mo2 Mo5 2.7700(5) 2_545 ?
Mo2 Mo3 2.7786(5) . ?
Mo2 Ti1 3.050(2) 3_554 ?
Mo2 Eu1 3.4137(5) 7_656 ?
Mo3 O9 2.039(3) 1_554 ?
Mo3 O7 2.054(3) . ?
Mo3 O2 2.074(3) 6_566 ?
Mo3 O10 2.083(3) 1_554 ?
Mo3 O3 2.084(3) 1_554 ?
Mo3 Mo4 2.6178(5) 5_665 ?
Mo3 Mo5 2.7073(7) 2_545 ?
Mo3 Mo5 2.7220(5) 6_665 ?
Mo3 Mo6 2.9197(17) . ?
Mo3 Ti1 3.1538(16) 3_554 ?
Mo4 O9 2.057(3) 5_666 ?
Mo4 O5 2.076(3) 5_666 ?
Mo4 O10 2.078(3) 5_666 ?
Mo4 O1 2.078(3) 6_676 ?
Mo4 O6 2.108(3) 4_664 ?
Mo4 Mo3 2.6178(5) 5_665 ?
Mo4 Mo5 2.7358(5) 6_675 ?
Mo4 Mo1 2.7502(7) 1_565 ?
Mo4 Mo2 2.7666(5) 1_565 ?
Mo4 Mo5 2.7799(5) 2 ?
Mo4 Ti1 2.9030(15) 5_666 ?
Mo4 Mo6 3.1364(18) 7_666 ?
Mo5 O9 2.023(3) 6_566 ?
Mo5 O3 2.056(3) 1_554 ?
Mo5 O10 2.071(3) 2_554 ?
Mo5 O8 2.077(3) . ?
Mo5 Mo3 2.7073(6) 2 ?
Mo5 Mo3 2.7220(5) 6_565 ?
Mo5 Mo4 2.7358(5) 6_575 ?
Mo5 Mo1 2.7611(5) 6_565 ?
Mo5 Mo2 2.7700(5) 2 ?
Mo5 Mo4 2.7799(5) 2_545 ?
Mo5 Mo5 2.8475(7) 5_565 ?
Mo6 Ti1 0.3599(13) 3_554 ?
Mo6 O4 1.844(5) 6_666 ?
Mo6 O2 1.906(4) 6_566 ?
Mo6 O7 1.934(4) . ?
Mo6 O6 2.041(3) 6_566 ?
Mo6 O5 2.046(4) 3_554 ?
Mo6 O8 2.148(4) . ?
Mo6 Mo4 3.1364(18) 7_656 ?
Ti1 Mo6 0.3599(13) 3 ?
Ti1 O5 1.842(3) . ?
Ti1 O8 1.891(3) 3 ?
Ti1 O6 1.903(3) 8_557 ?
Ti1 O7 2.064(4) 3 ?
Ti1 O2 2.111(4) 8_557 ?
Ti1 O4 2.126(5) 8_657 ?
Ti1 Mo4 2.9030(15) 5_666 ?
Ti1 Mo2 3.050(2) 3 ?
Ti1 Mo1 3.055(2) 3 ?
Ti1 Mo3 3.1538(16) 3 ?
Ti1 Eu1 3.6452(16) 3 ?
O1 Mo1 2.032(3) 6_566 ?
O1 Mo4 2.078(3) 6_576 ?
O1 Mo2 2.162(3) 3 ?
O1 Eu1 2.629(3) 5_666 ?
O2 Mo6 1.906(4) 6_666 ?
O2 Mo1 2.017(4) 6_666 ?
O2 Mo3 2.074(3) 6_666 ?
O2 Ti1 2.111(4) 8_657 ?
O2 Eu1 3.082(4) 2_646 ?
O3 Mo1 1.994(3) 6_566 ?
O3 Mo5 2.056(3) 1_556 ?
O3 Mo3 2.084(3) 1_556 ?
O3 Eu1 2.778(3) 5_666 ?
O4 Mo6 1.844(5) 6_566 ?
O4 Mo1 2.000(4) 6_566 ?
O4 Mo2 2.002(4) 6_566 ?
O4 Ti1 2.126(5) 8_557 ?
O4 Eu1 2.561(4) 4_565 ?
O5 Mo6 2.046(4) 3 ?
O5 Mo4 2.076(3) 5_666 ?
O5 Mo1 2.098(3) 6_566 ?
O6 Ti1 1.903(3) 8_657 ?
O6 Mo2 1.990(3) 4_655 ?
O6 Mo6 2.041(3) 6_666 ?
O6 Mo4 2.108(3) 4_665 ?
O6 Eu1 2.923(3) 6_666 ?
O7 Ti1 2.064(4) 3_554 ?
O7 Eu1 2.565(3) 2_545 ?
O8 Ti1 1.891(3) 3_554 ?
O8 Mo2 2.012(3) 2 ?
O9 Mo5 2.023(3) 6_666 ?
O9 Mo3 2.039(3) 1_556 ?
O9 Mo4 2.057(3) 5_666 ?
O9 Eu1 2.498(3) 5_666 ?
O10 Mo5 2.071(3) 2_546 ?
O10 Mo4 2.078(3) 5_666 ?
O10 Mo3 2.083(3) 1_556 ?
O10 Eu1 2.693(3) 2_546 ?
O10 Eu1 2.881(3) 6_566 ?

loop_
 _geom_angle_atom_site_label_1
 _geom_angle_atom_site_label_2
 _geom_angle_atom_site_label_3
 _geom_angle
 _geom_angle_site_symmetry_1
 _geom_angle_site_symmetry_3
 _geom_angle_publ_flag
O9 Eu1 O4 71.58(10) 5_666 4_564 ?
O9 Eu1 O7 67.64(10) 5_666 2 ?
O4 Eu1 O7 67.64(11) 4_564 2 ?
O9 Eu1 O1 99.45(10) 5_666 5_666 ?
O4 Eu1 O1 64.16(11) 4_564 5_666 ?
O7 Eu1 O1 131.69(10) 2 5_666 ?
O9 Eu1 O10 95.18(10) 5_666 2_554 ?
O4 Eu1 O10 133.92(11) 4_564 2_554 ?
O7 Eu1 O10 66.54(9) 2 2_554 ?
O1 Eu1 O10 160.24(10) 5_666 2_554 ?
O9 Eu1 O3 61.94(9) 5_666 5_666 ?
O4 Eu1 O3 98.79(10) 4_564 5_666 ?
O7 Eu1 O3 129.44(9) 2 5_666 ?
O1 Eu1 O3 63.10(9) 5_666 5_666 ?
O10 Eu1 O3 113.70(9) 2_554 5_666 ?
O9 Eu1 O8 130.36(9) 5_666 . ?
O4 Eu1 O8 94.46(10) 4_564 . ?
O7 Eu1 O8 63.08(10) 2 . ?
O1 Eu1 O8 117.16(9) 5_666 . ?
O10 Eu1 O8 60.31(9) 2_554 . ?
O3 Eu1 O8 164.73(9) 5_666 . ?
O9 Eu1 O10 119.90(9) 5_666 6_666 ?
O4 Eu1 O10 126.32(11) 4_564 6_666 ?
O7 Eu1 O10 164.85(9) 2 6_666 ?
O1 Eu1 O10 62.24(9) 5_666 6_666 ?
O10 Eu1 O10 98.87(9) 2_554 6_666 ?
O3 Eu1 O10 58.88(9) 5_666 6_666 ?
O8 Eu1 O10 106.89(9) . 6_666 ?
O9 Eu1 O6 133.28(9) 5_666 6_566 ?
O4 Eu1 O6 61.71(9) 4_564 6_566 ?
O7 Eu1 O6 92.71(10) 2 6_566 ?
O1 Eu1 O6 61.74(9) 5_666 6_566 ?
O10 Eu1 O6 115.93(9) 2_554 6_566 ?
O3 Eu1 O6 124.53(9) 5_666 6_566 ?
O8 Eu1 O6 56.42(9) . 6_566 ?
O10 Eu1 O6 90.19(9) 6_666 6_566 ?
O9 Eu1 O2 60.58(9) 5_666 2_654 ?
O4 Eu1 O2 132.03(10) 4_564 2_654 ?
O7 Eu1 O2 95.82(10) 2 2_654 ?
O1 Eu1 O2 118.68(9) 5_666 2_654 ?
O10 Eu1 O2 58.32(9) 2_554 2_654 ?
O3 Eu1 O2 56.38(9) 5_666 2_654 ?
O8 Eu1 O2 118.47(9) . 2_654 ?
O10 Eu1 O2 78.75(9) 6_666 2_654 ?
O6 Eu1 O2 166.00(9) 6_566 2_654 ?
O9 Eu1 Mo2 102.15(7) 5_666 7_666 ?
O4 Eu1 Mo2 35.68(8) 4_564 7_666 ?
O7 Eu1 Mo2 95.85(7) 2 7_666 ?
O1 Eu1 Mo2 39.30(7) 5_666 7_666 ?
O10 Eu1 Mo2 148.37(7) 2_554 7_666 ?
O3 Eu1 Mo2 97.82(6) 5_666 7_666 ?
O8 Eu1 Mo2 88.52(6) . 7_666 ?
O10 Eu1 Mo2 95.14(6) 6_666 7_666 ?
O6 Eu1 Mo2 35.55(6) 6_566 7_666 ?
O2 Eu1 Mo2 152.99(6) 2_654 7_666 ?
O9 Eu1 Mo3 34.06(7) 5_666 5_665 ?
O4 Eu1 Mo3 99.28(8) 4_564 5_665 ?
O7 Eu1 Mo3 96.10(7) 2 5_665 ?
O1 Eu1 Mo3 94.59(7) 5_666 5_665 ?
O10 Eu1 Mo3 90.10(7) 2_554 5_665 ?
O3 Eu1 Mo3 35.87(6) 5_666 5_665 ?
O8 Eu1 Mo3 148.24(6) . 5_665 ?
O10 Eu1 Mo3 87.67(6) 6_666 5_665 ?
O6 Eu1 Mo3 153.88(6) 6_566 5_665 ?
O2 Eu1 Mo3 35.54(6) 2_654 5_665 ?
Mo2 Eu1 Mo3 118.790(11) 7_666 5_665 ?
O3 Mo1 O4 172.99(14) 6_666 6_666 ?
O3 Mo1 O2 91.79(14) 6_666 6_566 ?
O4 Mo1 O2 87.28(16) 6_666 6_566 ?
O3 Mo1 O1 89.39(13) 6_666 6_666 ?
O4 Mo1 O1 90.93(15) 6_666 6_666 ?
O2 Mo1 O1 174.70(13) 6_566 6_666 ?
O3 Mo1 O5 86.05(12) 6_666 6_666 ?
O4 Mo1 O5 86.99(14) 6_666 6_666 ?
O2 Mo1 O5 88.93(13) 6_566 6_666 ?
O1 Mo1 O5 85.99(13) 6_666 6_666 ?
O3 Mo1 Mo2 139.32(9) 6_666 . ?
O4 Mo1 Mo2 47.67(11) 6_666 . ?
O2 Mo1 Mo2 90.47(10) 6_566 . ?
O1 Mo1 Mo2 92.01(9) 6_666 . ?
O5 Mo1 Mo2 134.62(9) 6_666 . ?
O3 Mo1 Mo6 136.04(10) 6_666 . ?
O4 Mo1 Mo6 42.77(13) 6_666 . ?
O2 Mo1 Mo6 44.53(10) 6_566 . ?
O1 Mo1 Mo6 133.59(9) 6_666 . ?
O5 Mo1 Mo6 88.11(10) 6_666 . ?
Mo2 Mo1 Mo6 61.36(4) . . ?
O3 Mo1 Mo4 90.97(9) 6_666 1_545 ?
O4 Mo1 Mo4 94.50(10) 6_666 1_545 ?
O2 Mo1 Mo4 136.41(10) 6_566 1_545 ?
O1 Mo1 Mo4 48.71(9) 6_666 1_545 ?
O5 Mo1 Mo4 134.66(9) 6_666 1_545 ?
Mo2 Mo1 Mo4 61.040(14) . 1_545 ?
Mo6 Mo1 Mo4 122.40(4) . 1_545 ?
O3 Mo1 Mo5 47.96(9) 6_666 6_665 ?
O4 Mo1 Mo5 138.99(11) 6_666 6_665 ?
O2 Mo1 Mo5 91.77(9) 6_566 6_665 ?
O1 Mo1 Mo5 92.85(9) 6_666 6_665 ?
O5 Mo1 Mo5 134.01(9) 6_666 6_665 ?
Mo2 Mo1 Mo5 91.372(15) . 6_665 ?
Mo6 Mo1 Mo5 122.66(3) . 6_665 ?
Mo4 Mo1 Mo5 59.524(13) 1_545 6_665 ?
O3 Mo1 Mo3 92.04(9) 6_666 . ?
O4 Mo1 Mo3 92.47(13) 6_666 . ?
O2 Mo1 Mo3 47.82(10) 6_566 . ?
O1 Mo1 Mo3 137.31(9) 6_666 . ?
O5 Mo1 Mo3 136.67(9) 6_666 . ?
Mo2 Mo1 Mo3 60.790(13) . . ?
Mo6 Mo1 Mo3 64.00(3) . . ?
Mo4 Mo1 Mo3 88.608(14) 1_545 . ?
Mo5 Mo1 Mo3 58.694(12) 6_665 . ?
O3 Mo1 Ti1 134.62(10) 6_666 3_554 ?
O4 Mo1 Ti1 43.84(12) 6_666 3_554 ?
O2 Mo1 Ti1 43.46(10) 6_566 3_554 ?
O1 Mo1 Ti1 134.40(9) 6_666 3_554 ?
O5 Mo1 Ti1 86.05(10) 6_666 3_554 ?
Mo2 Mo1 Ti1 63.69(3) . 3_554 ?
Mo6 Mo1 Ti1 2.34(5) . 3_554 ?
Mo4 Mo1 Ti1 124.72(3) 1_545 3_554 ?
Mo5 Mo1 Ti1 123.63(3) 6_665 3_554 ?
Mo3 Mo1 Ti1 65.09(2) . 3_554 ?
O3 Mo1 Eu1 47.87(9) 6_666 2_645 ?
O4 Mo1 Eu1 130.23(13) 6_666 2_645 ?
O2 Mo1 Eu1 135.67(10) 6_566 2_645 ?
O1 Mo1 Eu1 43.74(9) 6_666 2_645 ?
O5 Mo1 Eu1 73.11(9) 6_666 2_645 ?
Mo2 Mo1 Eu1 130.957(16) . 2_645 ?
Mo6 Mo1 Eu1 160.92(3) . 2_645 ?
Mo4 Mo1 Eu1 71.714(11) 1_545 2_645 ?
Mo5 Mo1 Eu1 74.725(11) 6_665 2_645 ?
Mo3 Mo1 Eu1 133.010(14) . 2_645 ?
Ti1 Mo1 Eu1 159.04(3) 3_554 2_645 ?
O6 Mo2 O4 90.28(15) 4_654 6_666 ?
O6 Mo2 O8 93.77(13) 4_654 2_545 ?
O4 Mo2 O8 171.12(14) 6_666 2_545 ?
O6 Mo2 O7 173.83(12) 4_654 . ?
O4 Mo2 O7 86.20(15) 6_666 . ?
O8 Mo2 O7 89.04(13) 2_545 . ?
O6 Mo2 O1 86.95(12) 4_654 3_554 ?
O4 Mo2 O1 82.81(13) 6_666 3_554 ?
O8 Mo2 O1 89.50(12) 2_545 3_554 ?
O7 Mo2 O1 87.58(12) . 3_554 ?
O6 Mo2 Mo1 91.77(9) 4_654 . ?
O4 Mo2 Mo1 47.59(10) 6_666 . ?
O8 Mo2 Mo1 139.97(9) 2_545 . ?
O7 Mo2 Mo1 89.60(9) . . ?
O1 Mo2 Mo1 130.39(9) 3_554 . ?
O6 Mo2 Mo6 132.12(10) 4_654 . ?
O4 Mo2 Mo6 41.86(13) 6_666 . ?
O8 Mo2 Mo6 133.30(10) 2_545 . ?
O7 Mo2 Mo6 44.42(10) . . ?
O1 Mo2 Mo6 85.53(9) 3_554 . ?
Mo1 Mo2 Mo6 59.65(4) . . ?
O6 Mo2 Mo4 49.36(9) 4_654 1_545 ?
O4 Mo2 Mo4 93.94(11) 6_666 1_545 ?
O8 Mo2 Mo4 94.69(9) 2_545 1_545 ?
O7 Mo2 Mo4 135.91(9) . 1_545 ?
O1 Mo2 Mo4 136.26(9) 3_554 1_545 ?
Mo1 Mo2 Mo4 60.434(16) . 1_545 ?
Mo6 Mo2 Mo4 120.08(4) . 1_545 ?
O6 Mo2 Mo5 93.89(9) 4_654 2_545 ?
O4 Mo2 Mo5 139.27(10) 6_666 2_545 ?
O8 Mo2 Mo5 48.34(9) 2_545 2_545 ?
O7 Mo2 Mo5 92.08(9) . 2_545 ?
O1 Mo2 Mo5 137.83(9) 3_554 2_545 ?
Mo1 Mo2 Mo5 91.751(15) . 2_545 ?
Mo6 Mo2 Mo5 122.01(3) . 2_545 ?
Mo4 Mo2 Mo5 60.277(12) 1_545 2_545 ?
O6 Mo2 Mo3 137.92(9) 4_654 . ?
O4 Mo2 Mo3 92.83(12) 6_666 . ?
O8 Mo2 Mo3 89.46(9) 2_545 . ?
O7 Mo2 Mo3 47.49(9) . . ?
O1 Mo2 Mo3 135.07(9) 3_554 . ?
Mo1 Mo2 Mo3 61.311(13) . . ?
Mo6 Mo2 Mo3 63.61(3) . . ?
Mo4 Mo2 Mo3 88.564(14) 1_545 . ?
Mo5 Mo2 Mo3 58.408(15) 2_545 . ?
O6 Mo2 Ti1 133.80(9) 4_654 3_554 ?
O4 Mo2 Ti1 43.96(12) 6_666 3_554 ?
O8 Mo2 Ti1 130.58(10) 2_545 3_554 ?
O7 Mo2 Ti1 42.27(9) . 3_554 ?
O1 Mo2 Ti1 81.99(9) 3_554 3_554 ?
Mo1 Mo2 Ti1 63.89(3) . 3_554 ?
Mo6 Mo2 Ti1 4.25(5) . 3_554 ?
Mo4 Mo2 Ti1 124.32(3) 1_545 3_554 ?
Mo5 Mo2 Ti1 123.55(3) 2_545 3_554 ?
Mo3 Mo2 Ti1 65.32(3) . 3_554 ?
O6 Mo2 Eu1 58.65(9) 4_654 7_656 ?
O4 Mo2 Eu1 48.24(12) 6_666 7_656 ?
O8 Mo2 Eu1 128.46(9) 2_545 7_656 ?
O7 Mo2 Eu1 115.42(9) . 7_656 ?
O1 Mo2 Eu1 50.36(9) 3_554 7_656 ?
Mo1 Mo2 Eu1 87.559(13) . 7_656 ?
Mo6 Mo2 Eu1 80.92(3) . 7_656 ?
Mo4 Mo2 Eu1 96.130(13) 1_545 7_656 ?
Mo5 Mo2 Eu1 152.477(15) 2_545 7_656 ?
Mo3 Mo2 Eu1 140.952(16) . 7_656 ?
Ti1 Mo2 Eu1 80.49(2) 3_554 7_656 ?
O9 Mo3 O7 168.78(12) 1_554 . ?
O9 Mo3 O2 88.08(13) 1_554 6_566 ?
O7 Mo3 O2 81.66(13) . 6_566 ?
O9 Mo3 O10 101.20(12) 1_554 1_554 ?
O7 Mo3 O10 88.50(12) . 1_554 ?
O2 Mo3 O10 168.55(13) 6_566 1_554 ?
O9 Mo3 O3 82.76(12) 1_554 1_554 ?
O7 Mo3 O3 91.60(12) . 1_554 ?
O2 Mo3 O3 83.94(13) 6_566 1_554 ?
O10 Mo3 O3 90.53(12) 1_554 1_554 ?
O9 Mo3 Mo4 50.57(9) 1_554 5_665 ?
O7 Mo3 Mo4 139.41(9) . 5_665 ?
O2 Mo3 Mo4 138.65(10) 6_566 5_665 ?
O10 Mo3 Mo4 50.92(8) 1_554 5_665 ?
O3 Mo3 Mo4 89.23(8) 1_554 5_665 ?
O9 Mo3 Mo5 97.29(8) 1_554 2_545 ?
O7 Mo3 Mo5 93.32(9) . 2_545 ?
O2 Mo3 Mo5 136.91(10) 6_566 2_545 ?
O10 Mo3 Mo5 49.14(9) 1_554 2_545 ?
O3 Mo3 Mo5 139.12(9) 1_554 2_545 ?
Mo4 Mo3 Mo5 61.802(13) 5_665 2_545 ?
O9 Mo3 Mo5 47.67(8) 1_554 6_665 ?
O7 Mo3 Mo5 136.70(9) . 6_665 ?
O2 Mo3 Mo5 91.64(9) 6_566 6_665 ?
O10 Mo3 Mo5 99.56(9) 1_554 6_665 ?
O3 Mo3 Mo5 130.40(9) 1_554 6_665 ?
Mo4 Mo3 Mo5 62.708(13) 5_665 6_665 ?
Mo5 Mo3 Mo5 63.266(14) 2_545 6_665 ?
O9 Mo3 Mo2 137.66(9) 1_554 . ?
O7 Mo3 Mo2 46.70(9) . . ?
O2 Mo3 Mo2 87.04(11) 6_566 . ?
O10 Mo3 Mo2 90.47(9) 1_554 . ?
O3 Mo3 Mo2 138.23(8) 1_554 . ?
Mo4 Mo3 Mo2 122.429(18) 5_665 . ?
Mo5 Mo3 Mo2 60.637(13) 2_545 . ?
Mo5 Mo3 Mo2 90.463(14) 6_665 . ?
O9 Mo3 Mo1 89.72(9) 1_554 . ?
O7 Mo3 Mo1 86.45(9) . . ?
O2 Mo3 Mo1 46.09(10) 6_566 . ?
O10 Mo3 Mo1 139.46(9) 1_554 . ?
O3 Mo3 Mo1 129.78(9) 1_554 . ?
Mo4 Mo3 Mo1 122.767(16) 5_665 . ?
Mo5 Mo3 Mo1 91.037(14) 2_545 . ?
Mo5 Mo3 Mo1 60.073(13) 6_665 . ?
Mo2 Mo3 Mo1 57.899(12) . . ?
O9 Mo3 Mo6 128.68(9) 1_554 . ?
O7 Mo3 Mo6 41.34(10) . . ?
O2 Mo3 Mo6 40.61(10) 6_566 . ?
O10 Mo3 Mo6 129.84(9) 1_554 . ?
O3 Mo3 Mo6 90.80(9) 1_554 . ?
Mo4 Mo3 Mo6 179.24(4) 5_665 . ?
Mo5 Mo3 Mo6 118.55(4) 2_545 . ?
Mo5 Mo3 Mo6 116.75(4) 6_665 . ?
Mo2 Mo3 Mo6 57.91(4) . . ?
Mo1 Mo3 Mo6 56.71(4) . . ?
O9 Mo3 Ti1 129.32(9) 1_554 3_554 ?
O7 Mo3 Ti1 40.15(9) . 3_554 ?
O2 Mo3 Ti1 41.55(10) 6_566 3_554 ?
O10 Mo3 Ti1 128.20(9) 1_554 3_554 ?
O3 Mo3 Ti1 85.89(9) 1_554 3_554 ?
Mo4 Mo3 Ti1 175.05(3) 5_665 3_554 ?
Mo5 Mo3 Ti1 121.96(3) 2_545 3_554 ?
Mo5 Mo3 Ti1 121.41(3) 6_665 3_554 ?
Mo2 Mo3 Ti1 61.49(3) . 3_554 ?
Mo1 Mo3 Ti1 61.48(3) . 3_554 ?
Mo6 Mo3 Ti1 5.16(3) . 3_554 ?
O9 Mo4 O5 86.05(13) 5_666 5_666 ?
O9 Mo4 O10 100.78(12) 5_666 5_666 ?
O5 Mo4 O10 95.46(12) 5_666 5_666 ?
O9 Mo4 O1 171.07(12) 5_666 6_676 ?
O5 Mo4 O1 88.57(13) 5_666 6_676 ?
O10 Mo4 O1 86.82(12) 5_666 6_676 ?
O9 Mo4 O6 86.97(12) 5_666 4_664 ?
O5 Mo4 O6 79.99(12) 5_666 4_664 ?
O10 Mo4 O6 170.79(12) 5_666 4_664 ?
O1 Mo4 O6 85.08(12) 6_676 4_664 ?
O9 Mo4 Mo3 49.97(8) 5_666 5_665 ?
O5 Mo4 Mo3 95.61(9) 5_666 5_665 ?
O10 Mo4 Mo3 51.10(9) 5_666 5_665 ?
O1 Mo4 Mo3 137.90(9) 6_676 5_665 ?
O6 Mo4 Mo3 136.93(9) 4_664 5_665 ?
O9 Mo4 Mo5 95.98(8) 5_666 6_675 ?
O5 Mo4 Mo5 143.87(9) 5_666 6_675 ?
O10 Mo4 Mo5 48.64(9) 5_666 6_675 ?
O1 Mo4 Mo5 92.57(8) 6_676 6_675 ?
O6 Mo4 Mo5 136.09(8) 4_664 6_675 ?
Mo3 Mo4 Mo5 60.707(15) 5_665 6_675 ?
O9 Mo4 Mo1 136.45(8) 5_666 1_565 ?
O5 Mo4 Mo1 135.23(9) 5_666 1_565 ?
O10 Mo4 Mo1 89.89(9) 5_666 1_565 ?
O1 Mo4 Mo1 47.30(9) 6_676 1_565 ?
O6 Mo4 Mo1 87.82(8) 4_664 1_565 ?
Mo3 Mo4 Mo1 121.110(16) 5_665 1_565 ?
Mo5 Mo4 Mo1 60.435(13) 6_675 1_565 ?
O9 Mo4 Mo2 88.28(8) 5_666 1_565 ?
O5 Mo4 Mo2 125.70(9) 5_666 1_565 ?
O10 Mo4 Mo2 138.52(9) 5_666 1_565 ?
O1 Mo4 Mo2 89.08(9) 6_676 1_565 ?
O6 Mo4 Mo2 45.77(8) 4_664 1_565 ?
Mo3 Mo4 Mo2 120.390(16) 5_665 1_565 ?
Mo5 Mo4 Mo2 90.431(14) 6_675 1_565 ?
Mo1 Mo4 Mo2 58.525(13) 1_565 1_565 ?
O9 Mo4 Mo5 46.54(8) 5_666 2 ?
O5 Mo4 Mo5 132.33(9) 5_666 2 ?
O10 Mo4 Mo5 97.90(9) 5_666 2 ?
O1 Mo4 Mo5 137.58(9) 6_676 2 ?
O6 Mo4 Mo5 91.04(9) 4_664 2 ?
Mo3 Mo4 Mo5 60.480(12) 5_665 2 ?
Mo5 Mo4 Mo5 62.158(14) 6_675 2 ?
Mo1 Mo4 Mo5 90.414(14) 1_565 2 ?
Mo2 Mo4 Mo5 59.923(13) 1_565 2 ?
O9 Mo4 Ti1 87.51(9) 5_666 5_666 ?
O5 Mo4 Ti1 39.16(9) 5_666 5_666 ?
O10 Mo4 Ti1 133.64(9) 5_666 5_666 ?
O1 Mo4 Ti1 83.82(9) 6_676 5_666 ?
O6 Mo4 Ti1 40.92(8) 4_664 5_666 ?
Mo3 Mo4 Ti1 123.88(4) 5_665 5_666 ?
Mo5 Mo4 Ti1 175.41(4) 6_675 5_666 ?
Mo1 Mo4 Ti1 114.97(3) 1_565 5_666 ?
Mo2 Mo4 Ti1 86.69(3) 1_565 5_666 ?
Mo5 Mo4 Ti1 119.04(4) 2 5_666 ?
O9 Mo4 Mo6 82.40(9) 5_666 7_666 ?
O5 Mo4 Mo6 40.10(9) 5_666 7_666 ?
O10 Mo4 Mo6 135.47(9) 5_666 7_666 ?
O1 Mo4 Mo6 88.90(9) 6_676 7_666 ?
O6 Mo4 Mo6 40.09(8) 4_664 7_666 ?
Mo3 Mo4 Mo6 120.24(4) 5_665 7_666 ?
Mo5 Mo4 Mo6 175.77(3) 6_675 7_666 ?
Mo1 Mo4 Mo6 118.31(3) 1_565 7_666 ?
Mo2 Mo4 Mo6 85.62(3) 1_565 7_666 ?
Mo5 Mo4 Mo6 114.31(4) 2 7_666 ?
Ti1 Mo4 Mo6 5.20(3) 5_666 7_666 ?
O9 Mo5 O3 88.89(12) 6_566 1_554 ?
O9 Mo5 O10 170.56(12) 6_566 2_554 ?
O3 Mo5 O10 84.81(12) 1_554 2_554 ?
O9 Mo5 O8 88.96(12) 6_566 . ?
O3 Mo5 O8 90.70(12) 1_554 . ?
O10 Mo5 O8 84.11(13) 2_554 . ?
O9 Mo5 Mo3 137.16(9) 6_566 2 ?
O3 Mo5 Mo3 133.95(9) 1_554 2 ?
O10 Mo5 Mo3 49.52(9) 2_554 2 ?
O8 Mo5 Mo3 90.10(9) . 2 ?
O9 Mo5 Mo3 48.18(8) 6_566 6_565 ?
O3 Mo5 Mo3 92.75(9) 1_554 6_565 ?
O10 Mo5 Mo3 139.03(9) 2_554 6_565 ?
O8 Mo5 Mo3 136.86(9) . 6_565 ?
Mo3 Mo5 Mo3 116.734(14) 2 6_565 ?
O9 Mo5 Mo4 138.40(8) 6_566 6_575 ?
O3 Mo5 Mo4 90.08(9) 1_554 6_575 ?
O10 Mo5 Mo4 48.85(9) 2_554 6_575 ?
O8 Mo5 Mo4 132.64(9) . 6_575 ?
Mo3 Mo5 Mo4 57.492(12) 2 6_575 ?
Mo3 Mo5 Mo4 90.367(14) 6_565 6_575 ?
O9 Mo5 Mo1 90.96(8) 6_566 6_565 ?
O3 Mo5 Mo1 46.09(8) 1_554 6_565 ?
O10 Mo5 Mo1 89.73(8) 2_554 6_565 ?
O8 Mo5 Mo1 136.77(9) . 6_565 ?
Mo3 Mo5 Mo1 117.503(16) 2 6_565 ?
Mo3 Mo5 Mo1 61.232(12) 6_565 6_565 ?
Mo4 Mo5 Mo1 60.041(15) 6_575 6_565 ?
O9 Mo5 Mo2 88.87(8) 6_566 2 ?
O3 Mo5 Mo2 137.04(8) 1_554 2 ?
O10 Mo5 Mo2 90.96(8) 2_554 2 ?
O8 Mo5 Mo2 46.37(9) . 2 ?
Mo3 Mo5 Mo2 60.955(13) 2 2 ?
Mo3 Mo5 Mo2 116.601(15) 6_565 2 ?
Mo4 Mo5 Mo2 118.438(17) 6_575 2 ?
Mo1 Mo5 Mo2 176.853(17) 6_565 2 ?
O9 Mo5 Mo4 47.56(9) 6_566 2_545 ?
O3 Mo5 Mo4 136.17(9) 1_554 2_545 ?
O10 Mo5 Mo4 139.01(9) 2_554 2_545 ?
O8 Mo5 Mo4 92.84(9) . 2_545 ?
Mo3 Mo5 Mo4 89.743(14) 2 2_545 ?
Mo3 Mo5 Mo4 56.812(12) 6_565 2_545 ?
Mo4 Mo5 Mo4 117.842(14) 6_575 2_545 ?
Mo1 Mo5 Mo4 118.032(15) 6_565 2_545 ?
Mo2 Mo5 Mo4 59.800(12) 2 2_545 ?
O9 Mo5 Mo5 93.42(9) 6_566 5_565 ?
O3 Mo5 Mo5 134.88(9) 1_554 5_565 ?
O10 Mo5 Mo5 96.00(9) 2_554 5_565 ?
O8 Mo5 Mo5 134.36(9) . 5_565 ?
Mo3 Mo5 Mo5 58.620(14) 2 5_565 ?
Mo3 Mo5 Mo5 58.115(16) 6_565 5_565 ?
Mo4 Mo5 Mo5 59.680(13) 6_575 5_565 ?
Mo1 Mo5 Mo5 88.797(17) 6_565 5_565 ?
Mo2 Mo5 Mo5 88.078(17) 2 5_565 ?
Mo4 Mo5 Mo5 58.162(14) 2_545 5_565 ?
Ti1 Mo6 O4 138.3(4) 3_554 6_666 ?
Ti1 Mo6 O2 120.5(4) 3_554 6_566 ?
O4 Mo6 O2 95.31(18) 6_666 6_566 ?
Ti1 Mo6 O7 106.4(4) 3_554 . ?
O4 Mo6 O7 93.56(18) 6_666 . ?
O2 Mo6 O7 89.33(15) 6_566 . ?
Ti1 Mo6 O6 62.8(4) 3_554 6_566 ?
O4 Mo6 O6 95.93(16) 6_666 6_566 ?
O2 Mo6 O6 95.04(15) 6_566 6_566 ?
O7 Mo6 O6 169.13(18) . 6_566 ?
Ti1 Mo6 O5 51.2(4) 3_554 3_554 ?
O4 Mo6 O5 92.98(16) 6_666 3_554 ?
O2 Mo6 O5 171.51(18) 6_566 3_554 ?
O7 Mo6 O5 91.95(14) . 3_554 ?
O6 Mo6 O5 82.29(14) 6_566 3_554 ?
Ti1 Mo6 O8 41.0(3) 3_554 . ?
O4 Mo6 O8 176.70(17) 6_666 . ?
O2 Mo6 O8 83.79(15) 6_566 . ?
O7 Mo6 O8 89.61(14) . . ?
O6 Mo6 O8 81.00(14) 6_566 . ?
O5 Mo6 O8 87.83(15) 3_554 . ?
Ti1 Mo6 Mo1 159.7(5) 3_554 . ?
O4 Mo6 Mo1 47.42(12) 6_666 . ?
O2 Mo6 Mo1 47.91(12) 6_566 . ?
O7 Mo6 Mo1 91.06(12) . . ?
O6 Mo6 Mo1 99.26(11) 6_566 . ?
O5 Mo6 Mo1 140.41(12) 3_554 . ?
O8 Mo6 Mo1 131.67(11) . . ?
Ti1 Mo6 Mo2 141.1(5) 3_554 . ?
O4 Mo6 Mo2 46.44(13) 6_666 . ?
O2 Mo6 Mo2 90.93(13) 6_566 . ?
O7 Mo6 Mo2 47.22(11) . . ?
O6 Mo6 Mo2 142.33(12) 6_566 . ?
O5 Mo6 Mo2 96.10(11) 3_554 . ?
O8 Mo6 Mo2 136.65(11) . . ?
Mo1 Mo6 Mo2 58.99(5) . . ?
Ti1 Mo6 Mo3 128.0(3) 3_554 . ?
O4 Mo6 Mo3 91.89(14) 6_666 . ?
O2 Mo6 Mo3 45.11(11) 6_566 . ?
O7 Mo6 Mo3 44.56(10) . . ?
O6 Mo6 Mo3 140.01(12) 6_566 . ?
O5 Mo6 Mo3 136.47(11) 3_554 . ?
O8 Mo6 Mo3 89.72(9) . . ?
Mo1 Mo6 Mo3 59.28(4) . . ?
Mo2 Mo6 Mo3 58.48(4) . . ?
Ti1 Mo6 Mo4 47.0(3) 3_554 7_656 ?
O4 Mo6 Mo4 92.73(13) 6_666 7_656 ?
O2 Mo6 Mo4 136.64(13) 6_566 7_656 ?
O7 Mo6 Mo4 132.60(12) . 7_656 ?
O6 Mo6 Mo4 41.69(9) 6_566 7_656 ?
O5 Mo6 Mo4 40.80(9) 3_554 7_656 ?
O8 Mo6 Mo4 85.79(11) . 7_656 ?
Mo1 Mo6 Mo4 125.87(5) . 7_656 ?
Mo2 Mo6 Mo4 123.87(5) . 7_656 ?
Mo3 Mo6 Mo4 174.78(7) . 7_656 ?
Ti1 Mo6 Eu1 65.9(4) 3_554 . ?
O4 Mo6 Eu1 128.93(13) 6_666 . ?
O2 Mo6 Eu1 58.96(12) 6_566 . ?
O7 Mo6 Eu1 125.79(11) . . ?
O6 Mo6 Eu1 50.11(9) 6_566 . ?
O5 Mo6 Eu1 113.96(12) 3_554 . ?
O8 Mo6 Eu1 47.98(10) . . ?
Mo1 Mo6 Eu1 95.68(5) . . ?
Mo2 Mo6 Eu1 149.88(7) . . ?
Mo3 Mo6 Eu1 95.70(4) . . ?
Mo4 Mo6 Eu1 83.26(4) 7_656 . ?
Mo6 Ti1 O5 120.1(4) 3 . ?
Mo6 Ti1 O8 131.8(4) 3 3 ?
O5 Ti1 O8 102.42(17) . 3 ?
Mo6 Ti1 O6 107.5(4) 3 8_557 ?
O5 Ti1 O6 91.76(15) . 8_557 ?
O8 Ti1 O6 91.66(16) 3 8_557 ?
Mo6 Ti1 O7 63.9(4) 3 3 ?
O5 Ti1 O7 94.07(14) . 3 ?
O8 Ti1 O7 93.36(14) 3 3 ?
O6 Ti1 O7 171.32(17) 8_557 3 ?
Mo6 Ti1 O2 51.1(4) 3 8_557 ?
O5 Ti1 O2 171.01(18) . 8_557 ?
O8 Ti1 O2 85.16(15) 3 8_557 ?
O6 Ti1 O2 92.85(14) 8_557 8_557 ?
O7 Ti1 O2 80.53(14) 3 8_557 ?
Mo6 Ti1 O4 35.2(3) 3 8_657 ?
O5 Ti1 O4 90.48(15) . 8_657 ?
O8 Ti1 O4 166.65(16) 3 8_657 ?
O6 Ti1 O4 91.40(15) 8_557 8_657 ?
O7 Ti1 O4 82.13(15) 3 8_657 ?
O2 Ti1 O4 81.70(16) 8_557 8_657 ?
Mo6 Ti1 Mo4 127.8(3) 3 5_666 ?
O5 Ti1 Mo4 45.38(10) . 5_666 ?
O8 Ti1 Mo4 97.63(12) 3 5_666 ?
O6 Ti1 Mo4 46.49(10) 8_557 5_666 ?
O7 Ti1 Mo4 139.37(11) 3 5_666 ?
O2 Ti1 Mo4 139.18(11) 8_557 5_666 ?
O4 Ti1 Mo4 93.90(11) 8_657 5_666 ?
Mo6 Ti1 Mo2 34.6(4) 3 3 ?
O5 Ti1 Mo2 91.62(12) . 3 ?
O8 Ti1 Mo2 133.82(11) 3 3 ?
O6 Ti1 Mo2 132.12(12) 8_557 3 ?
O7 Ti1 Mo2 41.35(10) 3 3 ?
O2 Ti1 Mo2 79.57(12) 8_557 3 ?
O4 Ti1 Mo2 40.82(11) 8_657 3 ?
Mo4 Ti1 Mo2 122.01(5) 5_666 3 ?
Mo6 Ti1 Mo1 18.0(4) 3 3 ?
O5 Ti1 Mo1 131.06(13) . 3 ?
O8 Ti1 Mo1 126.24(11) 3 3 ?
O6 Ti1 Mo1 91.78(11) 8_557 3 ?
O7 Ti1 Mo1 79.54(11) 3 3 ?
O2 Ti1 Mo1 41.08(11) 8_557 3 ?
O4 Ti1 Mo1 40.65(10) 8_657 3 ?
Mo4 Ti1 Mo1 122.10(4) 5_666 3 ?
Mo2 Ti1 Mo1 52.42(3) 3 3 ?
Mo6 Ti1 Mo3 46.9(3) 3 3 ?
O5 Ti1 Mo3 133.75(12) . 3 ?
O8 Ti1 Mo3 87.86(10) 3 3 ?
O6 Ti1 Mo3 133.41(12) 8_557 3 ?
O7 Ti1 Mo3 39.90(9) 3 3 ?
O2 Ti1 Mo3 40.66(10) 8_557 3 ?
O4 Ti1 Mo3 80.61(12) 8_657 3 ?
Mo4 Ti1 Mo3 174.50(7) 5_666 3 ?
Mo2 Ti1 Mo3 53.18(3) 3 3 ?
Mo1 Ti1 Mo3 53.43(3) 3 3 ?
Mo6 Ti1 Eu1 108.9(4) 3 3 ?
O5 Ti1 Eu1 126.85(13) . 3 ?
O8 Ti1 Eu1 50.10(11) 3 3 ?
O6 Ti1 Eu1 52.93(10) 8_557 3 ?
O7 Ti1 Eu1 126.73(10) 3 3 ?
O2 Ti1 Eu1 61.82(11) 8_557 3 ?
O4 Ti1 Eu1 123.76(11) 8_657 3 ?
Mo4 Ti1 Eu1 88.94(4) 5_666 3 ?
Mo2 Ti1 Eu1 141.29(6) 3 3 ?
Mo1 Ti1 Eu1 92.70(4) 3 3 ?
Mo3 Ti1 Eu1 94.37(3) 3 3 ?
Mo1 O1 Mo4 84.00(12) 6_566 6_576 ?
Mo1 O1 Mo2 134.38(16) 6_566 3 ?
Mo4 O1 Mo2 132.08(15) 6_576 3 ?
Mo1 O1 Eu1 103.95(12) 6_566 5_666 ?
Mo4 O1 Eu1 109.15(13) 6_576 5_666 ?
Mo2 O1 Eu1 90.34(11) 3 5_666 ?
Mo6 O2 Mo1 87.57(17) 6_666 6_666 ?
Mo6 O2 Mo3 94.28(16) 6_666 6_666 ?
Mo1 O2 Mo3 86.09(14) 6_666 6_666 ?
Mo6 O2 Ti1 8.45(5) 6_666 8_657 ?
Mo1 O2 Ti1 95.46(16) 6_666 8_657 ?
Mo3 O2 Ti1 97.79(15) 6_666 8_657 ?
Mo6 O2 Eu1 146.77(18) 6_666 2_646 ?
Mo1 O2 Eu1 125.35(14) 6_666 2_646 ?
Mo3 O2 Eu1 84.72(11) 6_666 2_646 ?
Ti1 O2 Eu1 139.15(16) 8_657 2_646 ?
Mo1 O3 Mo5 85.94(12) 6_566 1_556 ?
Mo1 O3 Mo3 133.91(16) 6_566 1_556 ?
Mo5 O3 Mo3 130.45(15) 1_556 1_556 ?
Mo1 O3 Eu1 99.97(12) 6_566 5_666 ?
Mo5 O3 Eu1 110.09(12) 1_556 5_666 ?
Mo3 O3 Eu1 92.77(11) 1_556 5_666 ?
Mo6 O4 Mo1 89.81(18) 6_566 6_566 ?
Mo6 O4 Mo2 91.7(2) 6_566 6_566 ?
Mo1 O4 Mo2 84.74(14) 6_566 6_566 ?
Mo6 O4 Ti1 6.46(6) 6_566 8_557 ?
Mo1 O4 Ti1 95.51(18) 6_566 8_557 ?
Mo2 O4 Ti1 95.22(19) 6_566 8_557 ?
Mo6 O4 Eu1 132.21(18) 6_566 4_565 ?
Mo1 O4 Eu1 137.8(2) 6_566 4_565 ?
Mo2 O4 Eu1 96.08(13) 6_566 4_565 ?
Ti1 O4 Eu1 126.24(16) 8_557 4_565 ?
Ti1 O5 Mo6 8.76(5) . 3 ?
Ti1 O5 Mo4 95.46(14) . 5_666 ?
Mo6 O5 Mo4 99.10(14) 3 5_666 ?
Ti1 O5 Mo1 135.55(18) . 6_566 ?
Mo6 O5 Mo1 128.96(17) 3 6_566 ?
Mo4 O5 Mo1 125.65(15) 5_666 6_566 ?
Ti1 O6 Mo2 177.45(19) 8_657 4_655 ?
Ti1 O6 Mo6 9.68(5) 8_657 6_666 ?
Mo2 O6 Mo6 171.78(19) 4_655 6_666 ?
Ti1 O6 Mo4 92.59(13) 8_657 4_665 ?
Mo2 O6 Mo4 84.87(12) 4_655 4_665 ?
Mo6 O6 Mo4 98.22(13) 6_666 4_665 ?
Ti1 O6 Eu1 95.77(12) 8_657 6_666 ?
Mo2 O6 Eu1 85.79(10) 4_655 6_666 ?
Mo6 O6 Eu1 97.50(12) 6_666 6_666 ?
Mo4 O6 Eu1 132.57(13) 4_665 6_666 ?
Mo6 O7 Mo2 88.36(15) . . ?
Mo6 O7 Mo3 94.10(14) . . ?
Mo2 O7 Mo3 85.81(12) . . ?
Mo6 O7 Ti1 9.62(5) . 3_554 ?
Mo2 O7 Ti1 96.38(15) . 3_554 ?
Mo3 O7 Ti1 99.96(14) . 3_554 ?
Mo6 O7 Eu1 157.09(17) . 2_545 ?
Mo2 O7 Eu1 107.25(13) . 2_545 ?
Mo3 O7 Eu1 103.48(13) . 2_545 ?
Ti1 O7 Eu1 147.63(16) 3_554 2_545 ?
Ti1 O8 Mo2 128.16(17) 3_554 2 ?
Ti1 O8 Mo5 134.76(18) 3_554 . ?
Mo2 O8 Mo5 85.29(12) 2 . ?
Ti1 O8 Mo6 7.17(5) 3_554 . ?
Mo2 O8 Mo6 135.25(17) 2 . ?
Mo5 O8 Mo6 129.30(16) . . ?
Ti1 O8 Eu1 99.08(14) 3_554 . ?
Mo2 O8 Eu1 98.62(12) 2 . ?
Mo5 O8 Eu1 105.23(12) . . ?
Mo6 O8 Eu1 97.72(12) . . ?
Mo5 O9 Mo3 84.15(11) 6_666 1_556 ?
Mo5 O9 Mo4 85.90(11) 6_666 5_666 ?
Mo3 O9 Mo4 79.45(11) 1_556 5_666 ?
Mo5 O9 Eu1 139.61(15) 6_666 5_666 ?
Mo3 O9 Eu1 102.61(12) 1_556 5_666 ?
Mo4 O9 Eu1 134.45(14) 5_666 5_666 ?
Mo5 O10 Mo4 82.52(11) 2_546 5_666 ?
Mo5 O10 Mo3 81.34(11) 2_546 1_556 ?
Mo4 O10 Mo3 77.98(11) 5_666 1_556 ?
Mo5 O10 Eu1 110.35(12) 2_546 2_546 ?
Mo4 O10 Eu1 166.19(15) 5_666 2_546 ?
Mo3 O10 Eu1 98.51(11) 1_556 2_546 ?
Mo5 O10 Eu1 105.96(12) 2_546 6_566 ?
Mo4 O10 Eu1 100.56(11) 5_666 6_566 ?
Mo3 O10 Eu1 172.39(15) 1_556 6_566 ?
Eu1 O10 Eu1 81.13(9) 2_546 6_566 ?

_diffrn_measured_fraction_theta_max    0.924
_diffrn_reflns_theta_full              44.95
_diffrn_measured_fraction_theta_full   0.924
_refine_diff_density_max    3.568
_refine_diff_density_min   -3.933
_refine_diff_density_rms    0.568

#===END
